# Supplementary material for: Medium-sized peptides from microbial sources with potential for antibacterial drug development
Source: Royal Society of Chemistry journal article supplement (doi:10.1039/d4np00002a), 2024-01-01
Supplement: d4np00002a1.pdf [file d4np00002a1.pdf]

## Medium-sized peptides from microbial sources with potential for antibacterial drug development

Table S1 Detailed information for all medium-sized antimicrobial peptides

| 1. Linear peptides |                 |                                                                                                                                                                                                                                                                 |                                                   |                                   |                                                                                                                                                                                           |                     |      |
|--------------------|-----------------|-----------------------------------------------------------------------------------------------------------------------------------------------------------------------------------------------------------------------------------------------------------------|---------------------------------------------------|-----------------------------------|-------------------------------------------------------------------------------------------------------------------------------------------------------------------------------------------|---------------------|------|
| No.                | Name            | Structure                                                                                                                                                                                                                                                       | Strain No.                                        | Source                            | Antimicrobial spectrum                                                                                                                                                                    | Target              | Ref. |
| 1                  | Emerimicin V    | 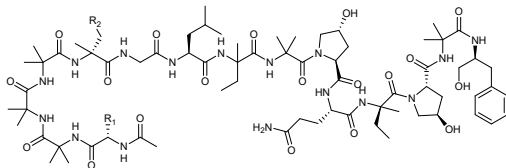                                                                                                                                                                               |                                                   |                                   | <i>E. faecalis</i> (64 µg/mL),<br>VRE (64 µg/mL), MRSA<br>(32 µg/mL)                                                                                                                      |                     |      |
| 2                  | Emerimicin VI   |                                                                                                                                                                                |                                                   |                                   | MRSA (64µg/mL)                                                                                                                                                                            |                     |      |
| 3                  | Emerimicin VII  |                                                                                                                                                                                                                                                                 | <i>Acremonium tubakii</i> W.                      | Soil sample (Salt Lake City, USA) |                                                                                                                                                                                           | -                   | 1    |
| 4                  | Emerimicin VIII | 1 R <sub>1</sub> =  , R <sub>2</sub> =CH <sub>3</sub> 4 R <sub>1</sub> =  , R <sub>2</sub> =H |                                                   | Gams                              | Inactive                                                                                                                                                                                  |                     |      |
| 5                  | Emerimicin IX   | 2 R <sub>1</sub> =  , R <sub>2</sub> =H      5 R <sub>1</sub> =  , R <sub>2</sub> =H          |                                                   |                                   |                                                                                                                                                                                           |                     |      |
| 6                  | Emerimicin X    | 3 R <sub>1</sub> =  , R <sub>2</sub> =CH <sub>3</sub> 6 R <sub>1</sub> =  , R <sub>2</sub> =H |                                                   |                                   |                                                                                                                                                                                           |                     |      |
| 7                  | NOSO-95A        |                                                                                                                                                                              | <i>Xenorhabdus nematophila</i> K102 (CNCM I-4530) | -                                 | <i>E. aerogenes</i> , <i>E. cloacae</i> ,<br><i>E. coli</i> , <i>K. pneumoniae</i> , <i>P. mirabilis</i> , <i>S. marcescens</i> ,<br><i>S. aureus</i> , <i>E. faecalis</i><br>(4-16µg/mL) | bacterial ribosomes | 2-4  |
| 8                  | NOSO-95B        |                                                                                                                                                                              |                                                   |                                   |                                                                                                                                                                                           |                     |      |

|    |                            |                                                                                                                                                                                             |                                                                                                                                                                                                                  |   |                                                                                                                          |                          |      |
|----|----------------------------|---------------------------------------------------------------------------------------------------------------------------------------------------------------------------------------------|------------------------------------------------------------------------------------------------------------------------------------------------------------------------------------------------------------------|---|--------------------------------------------------------------------------------------------------------------------------|--------------------------|------|
| 9  | NOSO-95C                   | 7 R <sub>1</sub> =R <sub>2</sub> =OH<br>8 R <sub>1</sub> =OH, R <sub>2</sub> =H<br>9 R <sub>1</sub> =H, R <sub>2</sub> =OH                                                                  |                                                                                                                                                                                                                  |   |                                                                                                                          |                          |      |
| 10 | NOSO-95179                 | 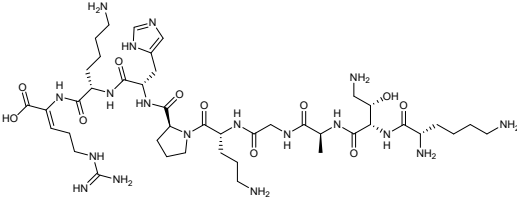                                                                                                          | semi-synthesis                                                                                                                                                                                                   | - |                                                                                                                          |                          |      |
| 11 | Aquimarin A                |                                                                                                                                                                                             |                                                                                                                                                                                                                  |   |                                                                                                                          |                          |      |
| 12 | Aquimarin B                |                                                                                                                                                                                             |                                                                                                                                                                                                                  |   |                                                                                                                          |                          |      |
| 13 | Aquimarin C                |                                                                                                            | Aquimarina sp.<br>Aq135                                                                                                                                                                                          | - | <i>E. faecalis</i> , <i>S. aureus</i> , <i>A. baumannii</i> , <i>M. tuberculosis</i> , <i>P. agglomerans</i><br>(1-8 μm) | -                        | 5    |
| 14 | Aquimarin D                |                                                                                                                                                                                             |                                                                                                                                                                                                                  |   |                                                                                                                          |                          |      |
| 15 | Aquimarin G                | 11 R <sub>1</sub> =H, R <sub>2</sub> =R <sub>3</sub> =Cl<br>12 R <sub>1</sub> =CH <sub>3</sub> , R <sub>2</sub> =R <sub>3</sub> =Cl<br>13 R <sub>1</sub> =R <sub>2</sub> =R <sub>3</sub> =H | 14 R <sub>1</sub> =CH <sub>3</sub> , R <sub>2</sub> =R <sub>3</sub> =H<br>15 R <sub>1</sub> =R <sub>2</sub> =H, R <sub>3</sub> =Cl<br>16 R <sub>1</sub> =CH <sub>3</sub> , R <sub>2</sub> =H, R <sub>3</sub> =Cl |   |                                                                                                                          |                          |      |
| 16 | Aquimarin H                |                                                                                                                                                                                             |                                                                                                                                                                                                                  |   | N/A                                                                                                                      |                          |      |
| 17 | Tridecaptin A <sub>1</sub> |                                                                                                          | <i>Paenibacillus terrae</i> NRRL B-30644                                                                                                                                                                         | - | Gram-negative bacteria<br>(3.13-50 μg/mL)                                                                                | bacterial cell membranes | 6-10 |

|    |                                      |                                                                                                                                                                                                                                                                                                                                                                                  |                                            |                  |                                                                                                                                                                                                                                           |
|----|--------------------------------------|----------------------------------------------------------------------------------------------------------------------------------------------------------------------------------------------------------------------------------------------------------------------------------------------------------------------------------------------------------------------------------|--------------------------------------------|------------------|-------------------------------------------------------------------------------------------------------------------------------------------------------------------------------------------------------------------------------------------|
| 18 | Tridecaptin B <sub>1</sub>           |                                                                                                                                                                                                                                                                                                                                                                                  | <i>Paenibacillus polymyxa</i> NRRL B-30509 |                  |                                                                                                                                                                                                                                           |
| 19 | Octyl-<br>Tridecaptin A <sub>1</sub> | <p>17 R<sub>1</sub>= CH<sub>3</sub>, R<sub>2</sub>=OH, R<sub>3</sub>=CH(CH<sub>3</sub>)<sub>2</sub>, R<sub>4</sub>=Bn</p> <p>18 R<sub>1</sub>= CH<sub>3</sub>, R<sub>2</sub>=H, R<sub>3</sub>=H, R<sub>4</sub>= CH((S)-CH<sub>3</sub>)C<sub>2</sub>H<sub>5</sub></p> <p>19 R<sub>1</sub>= H, R<sub>2</sub>=H, R<sub>3</sub>=CH(CH<sub>3</sub>)<sub>2</sub>, R<sub>4</sub>=Bn</p> | total synthesis                            |                  |                                                                                                                                                                                                                                           |
| 20 | Syn-BNP 1                            | 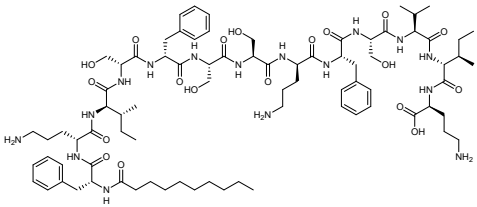                                                                                                                                                                                                                                                                                                | <i>Paenibacillus mucilaginosus</i> K02     | -                | <i>E. faecium</i> , MRSA, <i>A. baumannii</i> , <i>B. subtilis</i> , <i>L. rhamnosus</i> , <i>Strep. Sanguinis</i> , <i>Strep. Mitis</i> (4-64 µg/mL)                                                                                     |
| 21 | Syn-BNP 2                            |                                                                                                                                                                                                                                                                                                | <i>Xenorhabdus nematophila</i>             | -                | <i>C. albicans</i> , <i>S. pombe</i> , <i>S. cerevisiae</i> , <i>C. albidus</i> , <i>C. neoformans</i> , <i>S. chartarum</i> (4-32 µg/mL)                                                                                                 |
| 22 | Humimycin A                          | <br><p>22 R<sub>1</sub>= , R<sub>2</sub>= </p>                                                                          | <i>Rhodococcus equi</i>                    | Human microbiome | <i>S. aureus</i> , <i>S. epidermidis</i> , <i>S. mitis</i> , <i>S. mutans</i> , <i>S. delphini</i> , <i>S. intermedius</i> , <i>S. pseudintermedius</i> , <i>S. pneumoniae</i> , <i>S. sanguinis</i> , <i>R.</i> lipid II flippase (MurJ) |

10

11

|    |               |                                                                                                                                                                                                                                                                                                |                                 |                                                              |                                                                                                                   |                                                                   |    |
|----|---------------|------------------------------------------------------------------------------------------------------------------------------------------------------------------------------------------------------------------------------------------------------------------------------------------------|---------------------------------|--------------------------------------------------------------|-------------------------------------------------------------------------------------------------------------------|-------------------------------------------------------------------|----|
| 23 | Humimycin B   | 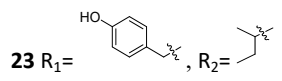 <p>23 R<sub>1</sub>= , R<sub>2</sub>= </p> | <i>Rhodococcus erythropolis</i> | <i>mucilaginosa</i> , <i>R. dentocariosa</i><br>(4-32 µg/mL) |                                                                                                                   |                                                                   |    |
| 24 | Muraymycin A1 |                                                                                                                                                                                                               |                                 |                                                              |                                                                                                                   |                                                                   |    |
| 25 | Muraymycin A2 |                                                                                                                                                                                                                                                                                                |                                 |                                                              |                                                                                                                   |                                                                   |    |
| 26 | Muraymycin A3 | <p>24 R<sub>1</sub>= , R<sub>2</sub>= , R<sub>3</sub>=OCH<sub>3</sub></p>                                                    | <i>Streptomyces</i> sp.         | -                                                            | <i>Staphylococcal</i> (2-16 µg/mL), <i>Enterococcal</i> (16- >64 µg/mL) and Gram-negative bacteria (8- >64 µg/mL) | Polyprenyl-phosphate N-acetyl hexose-mine 1-phosphate transferase | 12 |
| 27 | Muraymycin A4 | <p>25 R<sub>1</sub>= , R<sub>2</sub>= , R<sub>3</sub>=OCH<sub>3</sub></p>                                                    |                                 |                                                              |                                                                                                                   |                                                                   |    |
| 28 | Muraymycin A5 | <p>26 R<sub>1</sub>= , R<sub>2</sub>= , R<sub>3</sub>=OCH<sub>3</sub></p>                                                    |                                 |                                                              |                                                                                                                   |                                                                   |    |
| 29 | Muraymycin B1 | <p>27 R<sub>1</sub>= , R<sub>2</sub>= , R<sub>3</sub>=OH</p>                                                                 |                                 |                                                              |                                                                                                                   |                                                                   |    |
| 30 | Muraymycin B2 | <p>28 R<sub>1</sub>= , R<sub>2</sub>=H</p>                                                                                                                                                                   |                                 |                                                              |                                                                                                                   |                                                                   |    |
| 31 | Muraymycin B3 | <p>29 R<sub>1</sub>= , R<sub>2</sub>= , R<sub>3</sub>=OCH<sub>3</sub></p>                                                |                                 |                                                              |                                                                                                                   |                                                                   |    |
| 32 | Muraymycin B4 | <p>30 R<sub>1</sub>= , R<sub>2</sub>= , R<sub>3</sub>=OCH<sub>3</sub></p>                                                |                                 |                                                              |                                                                                                                   |                                                                   |    |
| 33 | Muraymycin B5 | <p>31 R<sub>1</sub>= , R<sub>2</sub>= , R<sub>3</sub>=OCH<sub>3</sub></p>                                                |                                 |                                                              |                                                                                                                   |                                                                   |    |

|    |               |                                                                                                                                                                                                                                                                                 |                                     |                                         |                                                   |                                                |    |
|----|---------------|---------------------------------------------------------------------------------------------------------------------------------------------------------------------------------------------------------------------------------------------------------------------------------|-------------------------------------|-----------------------------------------|---------------------------------------------------|------------------------------------------------|----|
| 34 | Muraymycin B6 | 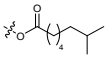 $R_1=$  $R_2=$  $R_3=OCH_3$ |                                     |                                         |                                                   |                                                |    |
| 35 | Muraymycin B7 |  $R_1=$  $R_2=$  $R_3=OH$    |                                     |                                         |                                                   |                                                |    |
| 36 | Muraymycin C1 |  $R_1=$  $R_2=$  $R_3=OCH_3$ |                                     |                                         |                                                   |                                                |    |
| 37 | Muraymycin C2 |  $R_1=$  $R_2=$  $R_3=OH$    |                                     |                                         |                                                   |                                                |    |
| 38 | Muraymycin C3 |  $R_1=OH, R_2=$  $R_3=OCH_3$                                                                                  |                                     |                                         |                                                   |                                                |    |
| 39 | Muraymycin C4 |  $R_1=OH, R_2=$  $R_3=OH$                                                                                     |                                     |                                         |                                                   |                                                |    |
| 40 | Muraymycin D1 |  $R_1=OH, R_2=$  $R_3=H$                                                                                      |                                     |                                         |                                                   |                                                |    |
| 41 | Muraymycin D2 |  $R_1=OH, R_2=H$                                                                                                                                                                               |                                     |                                         |                                                   |                                                |    |
| 42 | Muraymycin D3 |  $R_1=H, R_2=$  $R_3=OCH_3$                                                                                 |                                     |                                         |                                                   |                                                |    |
| 43 | Napsamycin A  |                                                                                                                                                                                              | <i>Streptomyces</i><br>sp. HIL Y-82 | Soil sample (Andaman<br>Islands, India) | <i>Pseudomonas aeruginosa</i><br>(6.25-50 mcg/ml) | ransloc-ase I<br>(MurX, known<br>as Mray<br>in | 13 |

|    |               |                                                                                                          |                     |             |                                                                               |                 |
|----|---------------|----------------------------------------------------------------------------------------------------------|---------------------|-------------|-------------------------------------------------------------------------------|-----------------|
| 44 | Napsamycin B  |                                                                                                          |                     |             |                                                                               | other bacteria) |
| 45 | Napsamycin C  | 43 R=H, X-X= CH=CH<br>44 R=CH <sub>3</sub> , X-X= CH=CH<br>45 R=H, X-X= CH <sub>2</sub> -CH <sub>2</sub> |                     |             |                                                                               |                 |
| 46 | Napsamycin D  | 46 R= CH <sub>3</sub> , X-X= CH <sub>2</sub> -CH <sub>2</sub>                                            |                     |             |                                                                               |                 |
| 47 | Sansanmycin A | 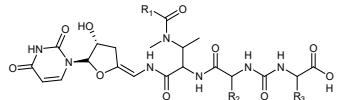                        |                     |             |                                                                               |                 |
| 48 | Sansanmycin B |                         |                     |             |                                                                               |                 |
| 49 | Sansanmycin C |                         |                     |             |                                                                               |                 |
| 50 | Sansanmycin D |                         | <i>Streptomyces</i> |             | <i>P. aeruginosa</i> (16<br>µg/mL),<br><i>M. tuberculosis</i> (2-16<br>µg/mL) | 14-19           |
| 51 | Sansanmycin E |                       | sp. SS              | Soil sample |                                                                               |                 |
| 52 | Sansanmycin F |                       |                     |             |                                                                               |                 |
| 53 | Sansanmycin G |                       |                     |             |                                                                               |                 |
| 54 | Sansanmycin H |                       |                     |             |                                                                               |                 |

|    |                      |  |                 |   |                                                                          |                                                       |    |
|----|----------------------|--|-----------------|---|--------------------------------------------------------------------------|-------------------------------------------------------|----|
| 55 | Sansanmycin I        |  |                 |   |                                                                          |                                                       |    |
| 56 | Sansanmycin J        |  |                 |   |                                                                          |                                                       |    |
| 57 | Sansanmycin K        |  |                 |   |                                                                          |                                                       |    |
| 58 | Sansanmycin L        |  |                 |   |                                                                          |                                                       |    |
| 59 | Sansanmycin M        |  |                 |   |                                                                          |                                                       |    |
| 60 | Sansanmycin N        |  |                 |   |                                                                          |                                                       |    |
| 61 | Sansanmycin O        |  |                 |   |                                                                          |                                                       |    |
| 62 | Dihydrosansanmycin A |  | total synthesis | - | <i>P. aeruginosa</i> (12.5-100 μm), <i>M. tuberculosis</i> (0.3-18.5 μm) | ransloc-ase I (MurX, known as MraY in other bacteria) | 20 |
| 63 | Dihydrosansanmycin B |  |                 |   |                                                                          |                                                       |    |

|           |                           |  |                                                                                                                                                               |                      |   |                                                                                                     |                                                     |    |
|-----------|---------------------------|--|---------------------------------------------------------------------------------------------------------------------------------------------------------------|----------------------|---|-----------------------------------------------------------------------------------------------------|-----------------------------------------------------|----|
| <b>64</b> | Dihydrosansan-<br>mycin C |  |                                                                                                                                                               |                      |   |                                                                                                     |                                                     |    |
| <b>65</b> | Phosphonoala-<br>mide A   |  |                                                                                                                                                               |                      |   | <i>E. coli</i> , <i>B. subtilis</i> , <i>B. cereus</i> , <i>B. megaterium</i><br>(6.25-200 $\mu$ m) |                                                     |    |
| <b>66</b> | Phosphonoala-<br>mide B   |  | <b>65</b> R <sub>1</sub> =R <sub>2</sub> =R <sub>3</sub> =H                                                                                                   | <i>Streptomyces</i>  |   |                                                                                                     |                                                     |    |
| <b>67</b> | Phosphonoala-<br>mide C   |  | <b>66</b> R <sub>1</sub> =CH <sub>3</sub> , R <sub>2</sub> =OH, R <sub>3</sub> =H                                                                             | sp. NRRL B-<br>2790  | - |                                                                                                     |                                                     | 21 |
| <b>68</b> | Phosphonoala-<br>mide D   |  | <b>67</b> R <sub>1</sub> =R <sub>2</sub> =H, R <sub>3</sub> =CH <sub>3</sub><br><b>68</b> R <sub>1</sub> =R <sub>2</sub> =CH <sub>3</sub> , R <sub>3</sub> =H |                      |   | N/A                                                                                                 |                                                     |    |
| <b>69</b> | Argolapho A               |  | <b>69</b> R =                                                                                                                                                 | <i>S. monomykini</i> |   | <i>E. coli</i> , <i>S. aureus</i> , <i>S. enterica</i><br>(no MIC values)                           | UDP-N-<br>acetylmuramyl-<br>L-alanine<br>synthetase | 22 |
| <b>70</b> | Argolapho B               |  | <b>70</b> R=H                                                                                                                                                 | NRRL B-24309         | - |                                                                                                     |                                                     |    |



|    |               |                                                                                   |                                      |   |                                                                                                                  |           |    |
|----|---------------|-----------------------------------------------------------------------------------|--------------------------------------|---|------------------------------------------------------------------------------------------------------------------|-----------|----|
| 71 | Klebsazolicin | 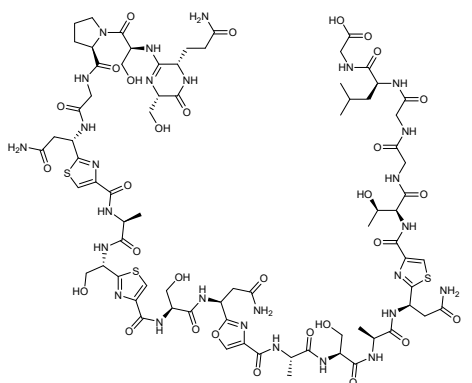 | <i>K. pneumoni-aesubs</i> ATCC 11296 | - | <i>E. coli</i> (32->1024 µg/mL), <i>K. pneumoniae</i> (128 µg/mL), <i>Yersinia pseudotuberculosis</i> (64 µg/mL) | ribosomes | 23 |
|----|---------------|-----------------------------------------------------------------------------------|--------------------------------------|---|------------------------------------------------------------------------------------------------------------------|-----------|----|

## 2.Cyclic oligopeptides

|    |                         |                                                                                    |                                                                                     |                                                                                     |                 |                |                                        |                                                                            |                                        |
|----|-------------------------|------------------------------------------------------------------------------------|-------------------------------------------------------------------------------------|-------------------------------------------------------------------------------------|-----------------|----------------|----------------------------------------|----------------------------------------------------------------------------|----------------------------------------|
| 72 | Ilamycin B <sub>1</sub> | 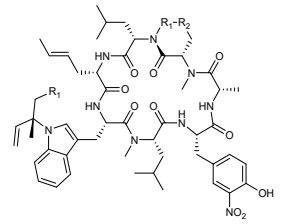 |                                                                                     |                                                                                     |                 |                | <i>M. tuberculosis</i> (2.4 µm)        |                                                                            |                                        |
| 73 | Ilamycin B <sub>2</sub> |                                                                                    |                                                                                     |                                                                                     |                 |                |                                        |                                                                            |                                        |
| 74 | Ilamycin C <sub>1</sub> |                                                                                    |                                                                                     |                                                                                     |                 |                |                                        |                                                                            |                                        |
| 75 | Ilamycin C <sub>2</sub> |                                                                                    | R <sub>1</sub>                                                                      | R <sub>2</sub>                                                                      | R <sub>3</sub>  | R <sub>4</sub> | <i>Streptomyces atratus</i> SCSIO ZH16 | marine-derived sample (South China Sea)                                    | tyrosine hydrolytic protein C1 (ClpC1) |
| 76 | Ilamycin D              | 72                                                                                 |  |  | NO <sub>2</sub> |                |                                        | <i>M. tuberculosis</i> (0.0098-9.6 µm), <i>M. smegmatis</i> (0.12-30.7 µm) |                                        |
| 77 | Ilamycin E <sub>1</sub> | 73                                                                                 |  |  | NO <sub>2</sub> |                |                                        |                                                                            |                                        |
|    |                         | 74                                                                                 |  |  | NO <sub>2</sub> |                |                                        |                                                                            |                                        |

|    |                         |    |                                                                                       |                                                                                     |                 |                      |                                 |
|----|-------------------------|----|---------------------------------------------------------------------------------------|-------------------------------------------------------------------------------------|-----------------|----------------------|---------------------------------|
| 78 | Ilamycin E <sub>2</sub> |    |                                                                                       |                                                                                     |                 |                      |                                 |
|    |                         | 75 |      |    | NO <sub>2</sub> |                      |                                 |
| 79 | Ilamycin F              |    |                                                                                       |                                                                                     |                 |                      |                                 |
|    |                         | 76 | H    |    | NO <sub>2</sub> |                      |                                 |
| 80 | Ilamycin G              |    |                                                                                       |                                                                                     |                 |                      |                                 |
|    |                         | 77 |      |    | NO <sub>2</sub> |                      |                                 |
| 81 | Ilamycin H              |    |                                                                                       |                                                                                     |                 |                      |                                 |
|    |                         | 78 |      |    | NO <sub>2</sub> |                      |                                 |
| 82 | Ilamycin I              |    |                                                                                       |                                                                                     |                 |                      |                                 |
|    |                         | 79 | H    |    | NO <sub>2</sub> |                      |                                 |
| 83 | Ilamycin J              |    |                                                                                       |                                                                                     |                 |                      |                                 |
|    |                         | 80 | H    |    | NO <sub>2</sub> |                      |                                 |
| 84 | Ilamycin K              |    |                                                                                       |                                                                                     |                 |                      |                                 |
|    |                         | 81 | H    |    | NO <sub>2</sub> | <i>Streptomyces</i>  |                                 |
| 85 | Ilamycin L              |    |                                                                                       |                                                                                     |                 | <i>atratus</i> SCSIO | <i>M. tuberculosis</i> (0.0096- |
|    |                         | 82 | H    |    | NO <sub>2</sub> | ZH16 ΔilaR           | 10 μm)                          |
| 86 | Ilamycin M              |    |                                                                                       |                                                                                     |                 |                      |                                 |
|    |                         | 83 |    |   | NO <sub>2</sub> |                      |                                 |
| 87 | Ilamycin N              |    |                                                                                       |                                                                                     |                 |                      |                                 |
|    |                         | 84 |    |  | NO <sub>2</sub> |                      |                                 |
| 88 | Ilamycin O              |    |                                                                                       |                                                                                     |                 |                      |                                 |
|    |                         | 85 | H  |  | NO <sub>2</sub> |                      |                                 |
| 89 | Ilamycin P              |    |                                                                                       |                                                                                     |                 |                      |                                 |
|    |                         | 86 | H  |  | NO <sub>2</sub> |                      |                                 |
| 90 | Ilamycin Q              |    |                                                                                       |                                                                                     |                 |                      |                                 |

|     |                |    |   |                                                                                     |                                                                                     |                 |                              |   |                                                                                  |    |
|-----|----------------|----|---|-------------------------------------------------------------------------------------|-------------------------------------------------------------------------------------|-----------------|------------------------------|---|----------------------------------------------------------------------------------|----|
|     |                | 87 | H |    |    | NHCHO           |                              |   |                                                                                  |    |
| 91  | Ilamycin R     |    |   |                                                                                     |                                                                                     |                 |                              |   |                                                                                  |    |
|     |                | 88 | H |    |    | H               |                              |   |                                                                                  |    |
| 92  | Rufomycin NBZ1 |    |   |                                                                                     |                                                                                     |                 |                              |   |                                                                                  |    |
|     |                | 89 |   |    |    | NO <sub>2</sub> |                              |   |                                                                                  |    |
| 93  | Rufomycin NBZ2 |    |   |                                                                                     |                                                                                     |                 |                              |   |                                                                                  |    |
|     |                | 90 | H |    |    | NO <sub>2</sub> |                              |   |                                                                                  |    |
| 94  | Rufomycin NBZ3 |    |   |                                                                                     |                                                                                     |                 |                              |   |                                                                                  |    |
|     |                | 91 |   |    |    | NO <sub>2</sub> |                              |   |                                                                                  |    |
| 95  | Rufomycin NBZ4 |    |   |                                                                                     |                                                                                     |                 |                              |   |                                                                                  |    |
|     |                | 92 | H |    |    | NO <sub>2</sub> | <i>S. atratus</i><br>MJM3502 | - | <i>M. tuberculosis</i> (0.030-<br>>10 μm), <i>M. abscessus</i><br>(0.54- >10 μm) | 26 |
| 96  | Rufomycin NBZ5 |    |   |                                                                                     |                                                                                     |                 |                              |   |                                                                                  |    |
|     |                | 93 | H |    |    | NO <sub>2</sub> |                              |   |                                                                                  |    |
| 97  | Rufomycin NBZ6 |    |   |                                                                                     |                                                                                     |                 |                              |   |                                                                                  |    |
|     |                | 94 | H |    |    | NO <sub>2</sub> |                              |   |                                                                                  |    |
| 98  | Rufomycin NBZ7 |    |   |                                                                                     |                                                                                     |                 |                              |   |                                                                                  |    |
|     |                | 95 | H |   |   | H               |                              |   |                                                                                  |    |
| 99  | Rufomycin NBZ8 |    |   |                                                                                     |                                                                                     |                 |                              |   |                                                                                  |    |
|     |                | 96 | H |  |  | NO <sub>2</sub> |                              |   |                                                                                  |    |
| 100 | RufomycinSS 1  |    |   |                                                                                     |                                                                                     |                 |                              |   |                                                                                  |    |
|     |                | 97 | H |  |  | NO <sub>2</sub> | semi-synthesis               | - | <i>M. tuberculosis</i> (12-4300<br>nM)                                           | 27 |
| 101 | RufomycinSS 2  |    |   |                                                                                     |                                                                                     |                 |                              |   |                                                                                  |    |
|     |                | 98 |   |  |  | NO <sub>2</sub> |                              |   |                                                                                  |    |
| 102 | RufomycinSS 3  |    |   |                                                                                     |                                                                                     |                 |                              |   |                                                                                  |    |
|     |                | 99 |   |  |  | NO <sub>2</sub> |                              |   |                                                                                  |    |

|     |                |     |                                                                                     |                 |
|-----|----------------|-----|-------------------------------------------------------------------------------------|-----------------|
| 103 | RufomycinSS 8  |     |                                                                                     |                 |
|     |                | 100 |    | NO <sub>2</sub> |
| 104 | RufomycinSS 9  |     |                                                                                     |                 |
|     |                | 101 |    | NO <sub>2</sub> |
| 105 | RufomycinSS 10 |     |                                                                                     |                 |
|     |                | 102 |    | NO <sub>2</sub> |
| 106 | RufomycinSS 11 |     |                                                                                     |                 |
|     |                | 103 |    | NO <sub>2</sub> |
| 107 | RufomycinSS 12 |     |                                                                                     |                 |
|     |                | 104 |    | NO <sub>2</sub> |
| 108 | RufomycinSS 13 |     |                                                                                     |                 |
|     |                | 105 |    | NO <sub>2</sub> |
| 109 | Rufomycin 6    |     |                                                                                     |                 |
|     |                | 106 |    | NO <sub>2</sub> |
| 110 | Rufomycin 7    |     |                                                                                     |                 |
|     |                | 107 |    | NO <sub>2</sub> |
|     |                | 108 |   | NO <sub>2</sub> |
|     |                | 109 |  | NO <sub>2</sub> |
|     |                | 110 |  | NO <sub>2</sub> |

|     |                                     |                                                                                                                                                           |                                                                                                                                                                                                           |             |                                                                                                                                                                       |                    |    |                                                                                                                                     |
|-----|-------------------------------------|-----------------------------------------------------------------------------------------------------------------------------------------------------------|-----------------------------------------------------------------------------------------------------------------------------------------------------------------------------------------------------------|-------------|-----------------------------------------------------------------------------------------------------------------------------------------------------------------------|--------------------|----|-------------------------------------------------------------------------------------------------------------------------------------|
| 111 | Metamarin                           | 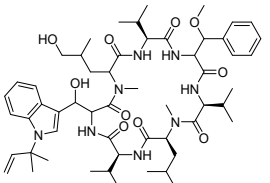                                                                         | heterologous expression<br>in <i>Streptomyces albus</i><br>J1074 (cosmids<br>DFD0097_w371,<br>DFD1080_w495)                                                                                               | soil sample | <i>M. tuberculosis</i> (0.16-<br>0.63 µg/mL)                                                                                                                          | ATPase of<br>ClpC1 | 28 |                                                                                                                                     |
| 112 | Lassomycin                          |                                                                         | <i>Lentzea kentuckyensis</i><br>IS009804                                                                                                                                                                  | soil sample | <i>M. tuberculosis</i> (0.78-3.1<br>µg/mL), <i>M. avium subsp.</i><br><i>paratuberculosis</i> (0.125-<br>0.25 µg/mL), <i>M.</i><br><i>smegmatis</i> (0.78-2<br>µg/mL) | ATPase of<br>ClpC1 | 29 |                                                                                                                                     |
| 113 | Asperver-<br>siamide A              |                                                                          | <br><b>118</b> R <sub>1</sub> =<br>     |             | <i>M. marinum</i> (23.4-87.5<br>µm), <i>M. tuberculosis</i> (100<br>µm)                                                                                               |                    | 30 |                                                                                                                                     |
| 114 | Asperver-<br>siamide B              |                                                                                                                                                           |                                                                                                                                                                                                           |             |                                                                                                                                                                       |                    |    | <br><b>119</b> R <sub>1</sub> =<br>CH <sub>3</sub> |
| 115 | Asperver-<br>siamide C              |                                                                                                                                                           |                                                                                                                                                                                                           |             |                                                                                                                                                                       |                    |    | <br><b>119</b> R <sub>1</sub> =<br>CH <sub>3</sub> |
| 116 | Asperhepta-<br>tide A               |                                                                                                                                                           |                                                                                                                                                                                                           |             |                                                                                                                                                                       |                    |    | <b>113</b> R <sub>1</sub> =OH, R <sub>2</sub> =OH,<br>R <sub>3</sub> =CH <sub>3</sub>                                               |
| 117 | Asperhepta-<br>tide B               | <b>114</b> R <sub>1</sub> =OH, R <sub>2</sub> =H, R <sub>3</sub> =<br>CH <sub>3</sub>                                                                     |                                                                                                                                                                                                           |             |                                                                                                                                                                       |                    |    |                                                                                                                                     |
| 118 | Asperver-<br>siamide A <sub>2</sub> | <b>115</b> R <sub>1</sub> =H, R <sub>2</sub> =OH, R <sub>3</sub> =<br>CH <sub>3</sub>                                                                     | <br><b>120</b> R <sub>1</sub> =<br> |             | <i>M. tuberculosis</i> (12.5-100<br>µm)                                                                                                                               |                    | 31 |                                                                                                                                     |
| 119 | Aspersia-<br>mide A <sub>6</sub>    | <b>116</b> R <sub>1</sub> =OH, R <sub>2</sub> =OH, R <sub>3</sub> =H<br><b>117</b> R <sub>1</sub> =H, R <sub>2</sub> =H, R <sub>3</sub> = CH <sub>3</sub> | <br><b>120</b> R <sub>1</sub> =<br> |             |                                                                                                                                                                       |                    |    |                                                                                                                                     |

|     |                               |  |                |                 |                |                |                |  |                                                                                    |   |                                       |       |
|-----|-------------------------------|--|----------------|-----------------|----------------|----------------|----------------|--|------------------------------------------------------------------------------------|---|---------------------------------------|-------|
| 120 | Aspersivamide A <sub>15</sub> |  |                |                 |                |                |                |  |                                                                                    |   |                                       |       |
| 121 | Aspersivamide A <sub>16</sub> |  |                |                 |                |                |                |  |                                                                                    |   |                                       |       |
| 122 | Darobactin A                  |  |                |                 |                |                |                |  | <i>Photorhabdus khanii</i> HGB1456                                                 |   | bacterial insertase BamA              |       |
| 123 | Darobactin B                  |  |                |                 |                |                |                |  | <i>Photorhabdus asymbiotica</i> ATCC43949                                          |   |                                       |       |
|     |                               |  | R <sub>1</sub> | R <sub>2</sub>  | R <sub>3</sub> | R <sub>4</sub> | R <sub>5</sub> |  |                                                                                    |   |                                       |       |
| 122 | Darobactin C                  |  |                | H               |                |                |                |  | <i>Yersinia pestis</i><br>Angola                                                   | - | Gram-negative bacteria<br>(0.5-64 μm) | 32-35 |
| 123 | Darobactin D                  |  |                | CH <sub>3</sub> |                |                |                |  | <i>Yersinia enterocolitica</i><br>subsp. <i>enterocolitica</i><br>strain NCTC13629 | - |                                       |       |
| 124 | Darobactin E                  |  |                | H               |                |                |                |  | <i>Yersinia bercovieri</i> stain SCPM-O-B-7607                                     |   |                                       |       |

|     |               |                                                                                     |                 |                                                                                   |                                                                                   |                                                                                    |                                  |   |                                        |   |    |
|-----|---------------|-------------------------------------------------------------------------------------|-----------------|-----------------------------------------------------------------------------------|-----------------------------------------------------------------------------------|------------------------------------------------------------------------------------|----------------------------------|---|----------------------------------------|---|----|
|     |               |    | H               |  |  |  |                                  |   |                                        |   |    |
| 127 | Darobactin F  |    | H               |  |  |  | <i>P. thracensis</i><br>DSM15199 |   |                                        |   |    |
|     |               |    | H               |  |  |  |                                  |   |                                        |   |    |
| 128 | Darobactin 9  |    | CH <sub>3</sub> |  |  |  | Biosynthetic<br>Engineering      |   |                                        |   |    |
| 129 | Darobactin 22 |                                                                                     |                 |                                                                                   |                                                                                   |                                                                                    |                                  |   |                                        |   |    |
| 130 | Dynobactin A  |  |                 |                                                                                   |                                                                                   |                                                                                    | <i>Photorhabdus australis</i>    | - | Gram-negative bacteria<br>(2-64 µg/ml) | - | 36 |

|     |                         |                                                                                   |                |                                                                                     |                |                 |                                                   |                                                                         |                                                                                                                  |                |       |
|-----|-------------------------|-----------------------------------------------------------------------------------|----------------|-------------------------------------------------------------------------------------|----------------|-----------------|---------------------------------------------------|-------------------------------------------------------------------------|------------------------------------------------------------------------------------------------------------------|----------------|-------|
| 131 | Lugdunin                | 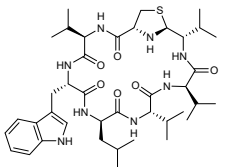 |                |                                                                                     |                |                 | <i>Staphylococcus lugdunensis</i><br>IVK28        | Human microbiome                                                        | MRSA, GISA, VRE, <i>L. monocytogenes</i> , <i>S. pneumoniae</i> , <i>B. subtilis</i><br>(1.5-12 µg/ml)           | cell membranes | 37    |
| 132 | Nicrophoru-<br>samide A |  |                |                                                                                     |                |                 | <i>Microbacterium</i><br>sp. UTG9                 | a gut bacterium (the<br>carrion beetle<br><i>Nicrophorus concolor</i> ) | <i>S. aureus</i> , <i>E. faecalis</i> , <i>E. faecium</i> , <i>S. enterica</i><br>(8-128 µg/ml)                  |                | 38-41 |
| 133 | Nicrophoru-<br>samide B |                                                                                   |                |                                                                                     |                |                 |                                                   |                                                                         | Inactive                                                                                                         |                | 36    |
|     |                         | R <sub>1</sub>                                                                    | R <sub>2</sub> | R <sub>3</sub>                                                                      | R <sub>4</sub> |                 |                                                   |                                                                         |                                                                                                                  |                |       |
| 134 | Ulleungmycin A          | 132                                                                               | OH             |    | Cl             | CH <sub>3</sub> |                                                   | -                                                                       | <i>S. aureus</i> , MRSA, QRSA,<br><i>B. subtilis</i> , <i>S. pneumoniae</i> , <i>E. faecalis</i><br>(8-16 µg/ml) | -              | 39    |
| 135 | Noursamycin A           | 133                                                                               | H              |    | Cl             | CH <sub>3</sub> | <i>Streptomyces</i><br><i>noursei</i> NTR-<br>SR4 | -                                                                       | <i>B. subtilis</i> , <i>S. typhimurium</i> , <i>M. luteus</i> ,<br><i>M. phlei</i><br>(4-16 µg/ml)               |                | 40    |
| 136 | Noursamycin C           | 135                                                                               | OH             |  | Cl             | CH <sub>3</sub> |                                                   |                                                                         | Inactive                                                                                                         |                |       |



|     |                     |     |    |                                                                                                                                                                                                                 |    |                 |                                                            |                                                                                           |       |
|-----|---------------------|-----|----|-----------------------------------------------------------------------------------------------------------------------------------------------------------------------------------------------------------------|----|-----------------|------------------------------------------------------------|-------------------------------------------------------------------------------------------|-------|
| 137 | Noursamycin D       | 136 | OH | 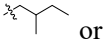 or                                           | Cl | CH <sub>3</sub> |                                                            |                                                                                           |       |
| 138 | Noursamycin E       | 137 | OH |                                                                                                                                | Cl | H               |                                                            |                                                                                           |       |
|     |                     | 138 | OH |                                                                                                                                | Cl | H               |                                                            |                                                                                           |       |
| 139 | Dechlorocuracomycin | 139 | OH |                                                                                                                                | H  | CH <sub>3</sub> | <i>Streptomyces noursei</i> NBRC 15452                     | 41                                                                                        |       |
| 140 | Pentamycin A        |     |    |                                                                                                                                |    |                 | <i>Streptomyces</i> sp. RK88-1441                          | N/A                                                                                       |       |
| 141 | Pentamycin B        |     |    |                                                                                                                                |    |                 |                                                            | <i>A. baumannii</i> (16-32 µg/ml)                                                         |       |
| 142 | Pentamycin C        |     |    | 140 R <sub>1</sub> =  , R <sub>2</sub> =      |    |                 |                                                            | <i>M. luteus</i> , <i>B. subtilis</i> , <i>S. aureus</i> , <i>A. baumannii</i> (16 µg/ml) | 42-45 |
| 143 | Pentamycin D        |     |    | 141 R <sub>1</sub> =  , R <sub>2</sub> =    |    |                 | <i>Streptomyces cacaoi</i> subsp. <i>cacaoi</i> NBRC 12748 | N/A                                                                                       |       |
| 144 | Pentamycin E        |     |    | 142 R <sub>1</sub> =  , R <sub>2</sub> =  |    |                 |                                                            |                                                                                           |       |
| 145 | Pentamycin          |     |    | 143 R <sub>1</sub> =  , R <sub>2</sub> =  |    |                 | <i>Streptomyces</i>                                        | Inactive                                                                                  |       |
|     |                     |     |    | 144 R <sub>1</sub> =  , R <sub>2</sub> =  |    |                 |                                                            |                                                                                           |       |

|     |                       |                                                                                    |                                                                        |                                                     |                                                          |                                                                                                                                                                        |   |       |
|-----|-----------------------|------------------------------------------------------------------------------------|------------------------------------------------------------------------|-----------------------------------------------------|----------------------------------------------------------|------------------------------------------------------------------------------------------------------------------------------------------------------------------------|---|-------|
|     | mycin F               |                                                                                    |                                                                        |                                                     |                                                          |                                                                                                                                                                        |   |       |
| 146 | Pentamino-<br>mycin G | 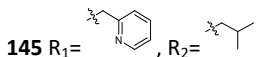  | 145 R <sub>1</sub> =<br>, R <sub>2</sub> =                             | <i>cacaoi</i> subsp.<br><i>cacaoi</i> CA-<br>170360 |                                                          |                                                                                                                                                                        |   |       |
| 147 | Pentamino-<br>mycin H |   | 146 R <sub>1</sub> =<br>, R <sub>2</sub> =                             |                                                     |                                                          |                                                                                                                                                                        |   |       |
| 148 | Pargamicin A          |                                                                                    | 147 R <sub>1</sub> =<br>, R <sub>2</sub> =                             |                                                     |                                                          |                                                                                                                                                                        |   |       |
| 149 | Pargamicin B          |                                                                                    | 148 R <sub>1</sub> =H, R <sub>2</sub> =Et                              |                                                     |                                                          |                                                                                                                                                                        |   |       |
| 150 | Pargamicin C          |   | 149 R <sub>1</sub> =H, R <sub>2</sub> =Me                              | <i>Amycolatopsis</i><br>sp. ML1-hF4                 | soil sample (Shinagawa,<br>Tokyo, Japan)                 | <i>E. faecalis</i> , VRE, <i>S. aureus</i> , MREA, <i>M. luteus</i> ,<br><i>E. faecium</i> , <i>B. subtilis</i> , <i>B. cereus</i> , <i>C. bovis</i><br>(0.5-64 µg/ml) | - | 46-47 |
| 151 | Pargamicin D          |                                                                                    | 150 R <sub>1</sub> =OH, R <sub>2</sub> =Et                             |                                                     |                                                          |                                                                                                                                                                        |   |       |
|     |                       |                                                                                    | 151 R <sub>1</sub> = =O, R <sub>2</sub> =Et                            |                                                     |                                                          |                                                                                                                                                                        |   |       |
| 152 | Broomeana-<br>amide A |  | 152 R <sub>1</sub> =CH <sub>3</sub> , R <sub>2</sub> = CH <sub>3</sub> | <i>Sphaerostilbella</i><br><i>broomeana</i>         | wood-inhabiting fungi<br>(the foothills of<br>Himalayas) | <i>C. neoformans</i> (8 µg/ml),<br><i>C. albicans</i> (64 µg/ml)                                                                                                       | - | 48    |
| 153 | Broomeana-<br>amide B |                                                                                    | 153 R <sub>1</sub> = CH <sub>3</sub> , R <sub>2</sub> =H               | TFC201724                                           |                                                          | N/A                                                                                                                                                                    |   |       |
|     |                       |                                                                                    | 154 R <sub>1</sub> =H, R <sub>2</sub> = CH <sub>3</sub>                |                                                     |                                                          |                                                                                                                                                                        |   |       |

|     |                         |                                                                                     |                                                     |                                                                           |                                                                                                                                                              |   |       |
|-----|-------------------------|-------------------------------------------------------------------------------------|-----------------------------------------------------|---------------------------------------------------------------------------|--------------------------------------------------------------------------------------------------------------------------------------------------------------|---|-------|
| 154 | Broomeana-<br>mide C    |                                                                                     |                                                     |                                                                           |                                                                                                                                                              |   |       |
| 155 | Thermoactino-<br>mide A | 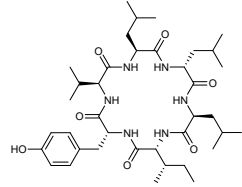   | <i>Thermoactinomyces vulgaris</i> strain ISCAR 2354 | A sample from coastal hot spring (Snæfellsness peninsula in West Iceland) | <i>S. aureus</i> (35 µm)                                                                                                                                     | - | 49    |
| 156 | Photoditritide          |    | <i>Photorhabdus temperata</i> Meg1                  | -                                                                         | <i>M. luteus</i> , <i>T. brucei rhodesiense</i> , <i>E. coli</i> , <i>P. falciparum</i> (3.0-27µm)                                                           | - | 50    |
| 157 | Malformin E             |    | <i>Aspergillus tamarii</i> FR02                     | the roots of <i>Ficus carica</i>                                          | <i>B. subtilis</i> , <i>S. aureus</i> , <i>P. aeruginosa</i> , <i>E. coli</i> , <i>P. chrysogenum</i> , <i>C. albicans</i> , <i>F. solani</i> (0.45-7.24 µm) | - | 51    |
| 158 | Desotamides A           |  | <i>Streptomyces</i> sp. NRRL 21611                  | soil sample (DeSoto Falls, GA)                                            | <i>S. aureus</i> , <i>B. subtilis</i> , <i>S. pneumoniae</i> , MRSE (clinical isolate shhs-E1) (12.5-32 µg/ml)                                               | - | 52-54 |
| 159 | Desotamides B           |  |                                                     |                                                                           |                                                                                                                                                              |   |       |

|     |               |                                                                                     |    |                                                                                   |                                                   |                                                |                                                                         |                                                                                          |
|-----|---------------|-------------------------------------------------------------------------------------|----|-----------------------------------------------------------------------------------|---------------------------------------------------|------------------------------------------------|-------------------------------------------------------------------------|------------------------------------------------------------------------------------------|
| 160 | Desotamides C | 158                                                                                 | Me |  | CH <sub>2</sub> CH(CH <sub>3</sub> ) <sub>2</sub> | <i>Streptomyces scopuliridis</i><br>SCSIO ZJ46 | a sediment sample collected in the South China Sea at a depth of 3536 m | Inactive                                                                                 |
| 161 | Desotamides D | 159                                                                                 | H  |  | CH <sub>2</sub> CH(CH <sub>3</sub> ) <sub>2</sub> |                                                |                                                                         |                                                                                          |
| 162 | Desotamides E | 160                                                                                 | Me |  | CH <sub>2</sub> CH(CH <sub>3</sub> ) <sub>2</sub> | <i>Streptomyces</i><br>nov. sp. (MST-115088)   | Soil sample from semiarid terrain (Wollogorang Station, Queensland)     | <i>B. subtilis</i> (3.5-5.2 μm)                                                          |
| 163 | Desotamides F | 161                                                                                 | Me |  | CH <sub>2</sub> CH(CH <sub>3</sub> ) <sub>2</sub> |                                                |                                                                         | <i>B. subtilis</i> (1.0-1.2 μm), <i>S. aureus</i> (5.5-6.8 μm)                           |
|     |               | 162                                                                                 | Me |  | CH(CH <sub>3</sub> ) <sub>2</sub>                 |                                                |                                                                         |                                                                                          |
|     |               | 163                                                                                 | Me |  | CH(CH <sub>3</sub> )C <sub>2</sub> H <sub>5</sub> |                                                |                                                                         |                                                                                          |
| 164 | Wollamides A  |  |    |                                                                                   | 164 R=Me                                          | <i>Streptomyces</i><br>nov. sp. (MST-115088)   | Soil sample from semiarid terrain (Wollogorang Station, Queensland)     | <i>B. subtilis</i> (1.8-2.0 μm),<br><i>M. bovis</i> (2.8 μm)                             |
| 165 | Wollamides B  |                                                                                     |    |                                                                                   | 165 R=H                                           |                                                |                                                                         | <i>B. subtilis</i> (1.9-2.2 μm), <i>S. aureus</i> (0.6-0.9 μm), <i>M. bovis</i> (3.1 μm) |

-

|                               |                       |                                                                                     |                                                                                                               |                                                     |                                                                                                                                  |                                                                                                            |   |       |
|-------------------------------|-----------------------|-------------------------------------------------------------------------------------|---------------------------------------------------------------------------------------------------------------|-----------------------------------------------------|----------------------------------------------------------------------------------------------------------------------------------|------------------------------------------------------------------------------------------------------------|---|-------|
| 166                           | Surugamide A          | 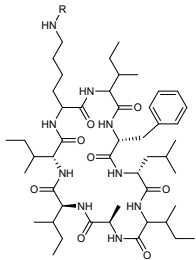   | 166 R=H                                                                                                       | <i>Streptomyces</i><br>sp. JAMM992                  | Deep-sea sediment<br>sample collected from<br>Kinko Bay (-106 m),<br>Japan                                                       | <i>S. aureus</i> (10µm)                                                                                    | - | 55-56 |
| 167                           | Acyl-<br>surugamide A |    | 167 R=                       | <i>Streptomyces</i><br><i>albus</i> J1074           | -                                                                                                                                | <i>S. aureus</i> , <i>B. subtilis</i> ,<br><i>S. cerevisiae</i> , <i>S. pombe</i><br>(3.5-32.5 µm)         | - |       |
| 168                           | Ellisiamide A         |    | 168 R <sub>1</sub> =CH <sub>3</sub> , R <sub>2</sub> = CH <sub>3</sub>                                        | <i>Xylaria ellisii</i> sp.<br><i>nov.</i>           | a leaf and stem<br>endophyte of <i>Vaccinium</i><br><i>angustifolium</i> (Nova<br>Scotia, New Brunswick,<br>and Ontario, Canada) | <i>E. coli</i> (100 µg/ml)                                                                                 | - | 57    |
| 169                           | Ellisiamide B         |                                                                                     | 169 R <sub>1</sub> =H, R <sub>2</sub> =CH(CH <sub>3</sub> ) <sub>2</sub>                                      |                                                     |                                                                                                                                  | inactive                                                                                                   | - |       |
| 170                           | Ellisiamide C         |                                                                                     | 170 R <sub>1</sub> = CH <sub>3</sub> ,<br>R <sub>2</sub> =CH(CH <sub>3</sub> )CH <sub>2</sub> CH <sub>3</sub> |                                                     |                                                                                                                                  |                                                                                                            |   |       |
| 171                           | Sclerotide A          |   | 171 Z                                                                                                         | <i>Aspergillus</i><br><i>sclerotiorum</i><br>PT06-1 | Marine sample (Putian<br>Sea<br>Salt Field, Fujian, China)                                                                       | <i>C. albicans</i> (7 µm)                                                                                  | - | 58    |
| 172                           | Sclerotide B          |                                                                                     | 172 E                                                                                                         |                                                     |                                                                                                                                  | <i>C. albicans</i> (3.5 µm),<br><i>P. aeruginosa</i> (35.3 µm)                                             | - |       |
| <b>3 Cyclic depsipeptides</b> |                       |                                                                                     |                                                                                                               |                                                     |                                                                                                                                  |                                                                                                            |   |       |
| 173                           | Atrovimycin A         |  | 173 R=OH                                                                                                      | <i>Streptomyces</i><br><i>atrovirens</i><br>LQ13    | soil sample (Xinjiang<br>Uygur Autonomous<br>Region of China.)                                                                   | <i>Fusarium. oxysporum</i> f.<br>sp. <i>Cucumerinum</i> (9.3<br>µm), <i>M. tuberculosis</i> (2.5<br>µg/ml) | - | 59    |
|                               |                       |                                                                                     | 174 R=H                                                                                                       |                                                     |                                                                                                                                  |                                                                                                            |   |       |

|     |               |  |                                         |                                               |                                                                                                 |                                                        |                                          |       |    |
|-----|---------------|--|-----------------------------------------|-----------------------------------------------|-------------------------------------------------------------------------------------------------|--------------------------------------------------------|------------------------------------------|-------|----|
| 174 | Atrovimycin B |  |                                         |                                               |                                                                                                 |                                                        |                                          |       |    |
| 175 | Atratamycin A |  | 175 R=                                  | <i>Streptomyces atratus</i> SCSIO ZH16        | sediment sample                                                                                 |                                                        |                                          |       |    |
| 176 | AtratamycinB  |  | 176 R=                                  | <i>Streptomyces atratus</i> SCSIO ZH16 NS-80S | engineered strain of <i>S. atratus</i> SCSIO ZH16                                               | <i>M. tuberculosis</i> (3.8-14.6 $\mu$ m)              | -                                        | 60-61 |    |
| 177 | Atratamycin C |  | 177 R=                                  |                                               |                                                                                                 |                                                        |                                          |       |    |
| 178 | Coprisamide A |  |                                         | <i>Streptomyces</i> sp. SNU533                | A sample from gut of the dung beetle <i>Copris tripartitus</i> (Jeju Island, Republic of Korea) | inactive                                               | -                                        | 62    |    |
| 179 | Coprisamide B |  | 178 R <sub>1</sub> =H, R <sub>2</sub> = | 179 R <sub>1</sub> = , R <sub>2</sub> =H      |                                                                                                 |                                                        |                                          |       |    |
| 180 | Coprisamide C |  | 180 R <sub>1</sub> =H, R <sub>2</sub> = |                                               | <i>Micromonospora</i> sp. UTJ3                                                                  | Sample from the carrion beetle <i>Silpha perforata</i> | <i>M. tuberculosis</i> (82.8 $\mu$ g/ml) | -     | 63 |

|     |               |                                                                                   |                                                                                     |                                                             |                                                                                          |                                                                           |                                                                  |   |
|-----|---------------|-----------------------------------------------------------------------------------|-------------------------------------------------------------------------------------|-------------------------------------------------------------|------------------------------------------------------------------------------------------|---------------------------------------------------------------------------|------------------------------------------------------------------|---|
| 181 | Coprisamide D |  | 181 R <sub>1</sub> =<br>R <sub>2</sub> =H                                           |                                                             |                                                                                          | inactive                                                                  |                                                                  |   |
| 182 | Skyllamycin A |  | 182 R <sub>1</sub> =<br>R <sub>2</sub> =CH <sub>3</sub>                             | <i>Streptomyces</i><br>sp. KY 11784                         | soil sample (Sakai-shi,<br>Osaka, Japan)                                                 | <i>S. aureus</i> (140 μm), <i>B.</i><br><i>subtilis</i> (105 μm)          |                                                                  |   |
| 183 | Skyllamycin B |                                                                                   | 183 R <sub>1</sub> =<br>R <sub>2</sub> =H                                           | <i>Streptomyces</i><br>sp. Acta 2897                        | Sandy soil sample<br>(Warkworth, UK)                                                     | N/A                                                                       |                                                                  |   |
| 184 | Skyllamycin C |                                                                                   | 184 R <sub>1</sub> =<br>R <sub>2</sub> =H                                           | <i>Streptomyces</i><br>sp. strain 1675                      | sediment sample from<br>Westport Jetty, WA, USA                                          | -                                                                         | 64-67                                                            |   |
| 185 | Skyllamycin D |                                                                                   | 185 R <sub>1</sub> =<br>R <sub>2</sub> =CH <sub>3</sub>                             | <i>Streptomyces</i><br><i>anulatus</i> strain<br>ATCC 11523 | A sample from the New<br>Zealand lichen<br><i>Pseudocyphellaria</i><br><i>dissimilis</i> | <i>B. subtilis</i> (8-32 μg/ml), <i>S.</i><br><i>aureus</i> (16-64 μg/ml) |                                                                  |   |
| 186 | Skyllamycin E |                                                                                   | 186 R <sub>1</sub> =<br>R <sub>2</sub> =CH <sub>3</sub>                             |                                                             |                                                                                          |                                                                           |                                                                  |   |
| 187 | Nyuzenamide A |                                                                                   |  | 187 R=                                                      | <i>Streptomyces</i><br>sp. N11-34                                                        | deep sea derived sample<br>(Toyama, Japan)                                | <i>G. cingulate</i> (3.1 μg/ml),<br><i>T. rubrum</i> (6.3 μg/ml) | - |
|     |               | 188 R=                                                                            |                                                                                     |                                                             |                                                                                          |                                                                           |                                                                  |   |

|     |               |                                                                                   |  |  |  |  |  |  |  |
|-----|---------------|-----------------------------------------------------------------------------------|--|--|--|--|--|--|--|
| 188 | Nyuzenamide B |                                                                                   |  |  |  |  |  |  |  |
|     |               |                                                                                   |  |  |  |  |  |  |  |
|     |               |                                                                                   |  |  |  |  |  |  |  |
|     |               |                                                                                   |  |  |  |  |  |  |  |
| 189 | Nyuzenamide C |                                                                                   |  |  |  |  |  |  |  |
|     |               |                                                                                   |  |  |  |  |  |  |  |
|     |               |                                                                                   |  |  |  |  |  |  |  |
|     |               |                                                                                   |  |  |  |  |  |  |  |
| 190 | Cinnapeptin   | 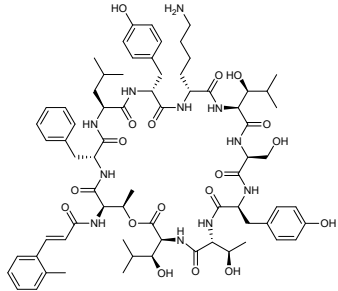 |  |  |  |  |  |  |  |
|     |               |                                                                                   |  |  |  |  |  |  |  |
|     |               |                                                                                   |  |  |  |  |  |  |  |
|     |               |                                                                                   |  |  |  |  |  |  |  |
| 191 | Svetamycin A  |                                                                                   |  |  |  |  |  |  |  |
|     |               |                                                                                   |  |  |  |  |  |  |  |
|     |               |                                                                                   |  |  |  |  |  |  |  |
|     |               |                                                                                   |  |  |  |  |  |  |  |
| 192 | Svetamycin B  |                                                                                   |  |  |  |  |  |  |  |
|     |               |                                                                                   |  |  |  |  |  |  |  |
|     |               |                                                                                   |  |  |  |  |  |  |  |
|     |               |                                                                                   |  |  |  |  |  |  |  |
| 193 | Svetamycin C  |                                                                                   |  |  |  |  |  |  |  |
|     |               |                                                                                   |  |  |  |  |  |  |  |
|     |               |                                                                                   |  |  |  |  |  |  |  |
|     |               |                                                                                   |  |  |  |  |  |  |  |

189 R=

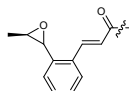

*Streptomyces*  
sp.  
DM14

river sediment sample  
(Dumulmeori, Republic of  
Korea)

inactive

*Streptomyces*  
*ghanaensis*

-

*B. subtilis*, *S. hominis*, *S.*  
*agalactiae*, *S. mutans*, *S.*  
*pombe*  
(5.7-11.4  $\mu$ m)

-

70

191 Svetamycin A

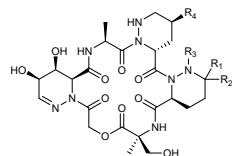

192 Svetamycin B

R<sub>1</sub> R<sub>2</sub> R<sub>3</sub> R<sub>4</sub>

193 Svetamycin C

|     |   |    |   |    |
|-----|---|----|---|----|
| 191 | H | H  | H | Cl |
| 192 | H | Me | H | Cl |

*Streptomyces*  
sp. DSM 14386

Bought from DSMZ-  
German Collection of  
Microorganisms and Cell  
Cultures, Braunschweig,  
Germany.

*M. smegmatis* (32  
 $\mu$ g/ml), MRSA (64  $\mu$ g/ml)

N/A

-

71

*M. smegmatis* (8  $\mu$ g/ml),  
MRSA (16  $\mu$ g/ml), *M.*  
*tuberculosis* (54  $\mu$ g/ml)



|     |                     |                                                                                                              |                                                                                                                                                               |             |   |    |                                     |                                                                                            |                                                                                                                                                |     |       |  |
|-----|---------------------|--------------------------------------------------------------------------------------------------------------|---------------------------------------------------------------------------------------------------------------------------------------------------------------|-------------|---|----|-------------------------------------|--------------------------------------------------------------------------------------------|------------------------------------------------------------------------------------------------------------------------------------------------|-----|-------|--|
| 194 | Svetamycin D        |                                                                                                              |                                                                                                                                                               |             |   |    |                                     | N/A                                                                                        |                                                                                                                                                |     |       |  |
|     |                     | 193                                                                                                          | Me                                                                                                                                                            | Me          | H | Cl |                                     |                                                                                            |                                                                                                                                                |     |       |  |
| 195 | Svetamycin F        | 194                                                                                                          | H                                                                                                                                                             | $\pi$ -band |   | Cl |                                     | <i>M. smegmatis</i> (2-32 $\mu\text{g/ml}$ ), MRSA (16-64 $\mu\text{g/ml}$ )               |                                                                                                                                                |     |       |  |
|     |                     | 195                                                                                                          | H                                                                                                                                                             | H           | H | Br |                                     |                                                                                            |                                                                                                                                                |     |       |  |
| 196 | Svetamycin G        | 196                                                                                                          | Me                                                                                                                                                            | Me          | H | Br |                                     |                                                                                            |                                                                                                                                                |     |       |  |
| 197 | Meliponamycin<br>A  | 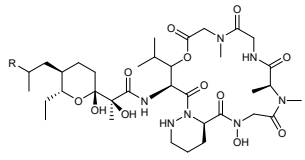 <p>197 R=H    198 R=Me</p> |                                                                                                                                                               |             |   |    | <i>Streptomyces</i><br>sp. ICBG1318 | Sample isolated<br>from <i>M. scutellaris</i> nurse<br>bees.                               | <i>P. larvae</i> (0.43 $\mu\text{g/ml}$ ), <i>S. aureus</i> (0.86-1.72 $\mu\text{g/ml}$ ),<br><i>L. infantum</i> (1.03-2.19 $\mu\text{g/ml}$ ) | -   | 72    |  |
| 198 | Meliponamycin<br>B  |                                                                                                              |                                                                                                                                                               |             |   |    |                                     |                                                                                            |                                                                                                                                                |     |       |  |
| 199 | Dentigerumycin<br>A |                            |                                                                                                                                                               |             |   |    | <i>Pseudonocardia</i><br>spp.       | Isolated from ant<br>( <i>Apterostigma</i><br><i>dentigerum</i> ) nest<br>(Gamboa, Panama) | <i>Escovopsis</i> sp. (2.8 $\mu\text{m}$ )                                                                                                     | -   | 73-76 |  |
| 200 | Dentigerumycin<br>B |                                                                                                              |                                                                                                                                                               |             |   |    |                                     |                                                                                            |                                                                                                                                                |     |       |  |
|     |                     | 199                                                                                                          | $\text{R}_1=\text{CH}_2\text{CH}_2\text{CH}_3$ , $\text{R}_2=\text{CH}_3$ , $\text{R}_3=\text{H}$ , $\text{R}_4=\text{OH}$ , $\text{R}_5=\text{CH}_3$         |             |   |    |                                     | <i>Streptomyces</i><br>sp. M41                                                             | isolated from<br>a South African termite,<br><i>Macrotermes natalensis</i>                                                                     | N/A |       |  |
|     |                     | 200                                                                                                          | $\text{R}_1=\text{CH}_2\text{CH}_3$ , $\text{R}_2=\text{CH}(\text{S-OH})\text{CH}_3$ , $\text{R}_3=\text{OH}$ , $\text{R}_4=\text{H}$ , $\text{R}_5=\text{H}$ |             |   |    |                                     |                                                                                            |                                                                                                                                                |     |       |  |

|     |                     |                                                                                               |                                                                                    |                                                                                                               |                                               |                                  |
|-----|---------------------|-----------------------------------------------------------------------------------------------|------------------------------------------------------------------------------------|---------------------------------------------------------------------------------------------------------------|-----------------------------------------------|----------------------------------|
| 201 | Dentigerumycin<br>C | <b>203</b> $R_1=CH_2COOH$ , $R_2=CH(S-OH)CH_3$ , $R_3=OH$ , $R_4=H$ ,<br>$R_5=H$              |                                                                                    |                                                                                                               |                                               |                                  |
| 202 | Dentigerumycin<br>D | <b>204</b> $R_1=CH_2CH_3$ , $R_2=CH_3$ , $R_3=H$ , $R_4=OH$ , $R_5=CH_3$                      | 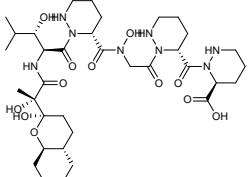  |                                                                                                               |                                               |                                  |
| 203 | Dentigerumycin<br>E | <b>201</b>   | <i>Streptomyces</i><br>sp. JB5                                                     | isolated from an<br>intertidal mudflat<br>(Wando, Korea)                                                      |                                               |                                  |
| 204 | Dentigerumycin<br>F | <b>202</b>  | <i>Pseudonocardia</i><br>sp. ICBG1122<br>(Ps1122)                                  | isolated from the nest of<br>the ant <i>Trachymyrmex</i><br>sp. (the Adolpho Ducke<br>Forest Reserve, Brazil) | <i>Escovopsis</i> sp (8 µg/ml)                |                                  |
| 205 | Marformycin A       | <b>205</b> $R_1=H$ , $R_2=Me$ , $R_3=H$                                                       |  | <i>Streptomyces</i><br><i>drozdowiczii</i><br>SCSIO 10141.                                                    | marine-derived sample<br>(South<br>China Sea) | <i>M. luteus</i> (0.063-4 µg/ml) |
| 206 | Marformycin B       | <b>206</b> $R_1=H$ , $R_2=Me$ , $R_3=Me$                                                      |                                                                                    |                                                                                                               |                                               |                                  |
| 207 | Marformycin C       | <b>207</b> $R_1=OH$ , $R_2=H$ , $R_3=Me$                                                      |                                                                                    |                                                                                                               |                                               |                                  |
| 208 | Marformycin D       | <b>208</b> $R_1=OH$ , $R_2=Me$ ,<br>$R_3=Me$                                                  |                                                                                    |                                                                                                               |                                               |                                  |
| 209 | Marformycin E       | <b>209</b> $R_1=OH$ , $R_2=H$ , $R_3=H$                                                       |                                                                                    |                                                                                                               |                                               |                                  |
| 210 | Marformycin F       | <b>210</b> $R_1=H$ , $R_2=H$ , $R_3=H$                                                        |                                                                                    |                                                                                                               |                                               |                                  |

-

|     |                   |                                                                                     |                                                                                       |                |                                                                                   |                                    |                                               |                                                                                                              |                         |       |
|-----|-------------------|-------------------------------------------------------------------------------------|---------------------------------------------------------------------------------------|----------------|-----------------------------------------------------------------------------------|------------------------------------|-----------------------------------------------|--------------------------------------------------------------------------------------------------------------|-------------------------|-------|
| 211 | Aurantimycin A    | 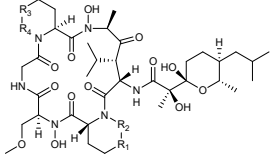   |                                                                                       |                |                                                                                   |                                    |                                               |                                                                                                              |                         |       |
| 212 | Aurantimycin B    |                                                                                     |                                                                                       |                |                                                                                   |                                    |                                               |                                                                                                              |                         |       |
| 213 | Aurantimycin C    |                                                                                     |                                                                                       |                |                                                                                   |                                    |                                               |                                                                                                              |                         |       |
|     |                   |                                                                                     | R <sub>1</sub>                                                                        | R <sub>2</sub> | R <sub>3</sub>                                                                    | R <sub>4</sub>                     | IMET43917                                     |                                                                                                              |                         |       |
|     |                   | 211                                                                                 |      |                |  |                                    |                                               |                                                                                                              |                         |       |
|     |                   | 212                                                                                 |      |                |  |                                    |                                               |                                                                                                              |                         |       |
|     |                   | 213                                                                                 |      |                |  |                                    |                                               |                                                                                                              |                         |       |
| 214 | Krisynomycin A    |    |                                                                                       |                |                                                                                   |                                    |                                               |                                                                                                              |                         |       |
| 215 | Krisynomycin B    |                                                                                     | 214 R <sub>1</sub> =Cl, R <sub>2</sub> =Cl                                            |                |                                                                                   |                                    |                                               |                                                                                                              |                         |       |
| 216 | Krisynomycin C    |                                                                                     | 215 R <sub>1</sub> =H, R <sub>2</sub> =H<br>216 R <sub>1</sub> =Cl, R <sub>2</sub> =H |                |                                                                                   |                                    |                                               |                                                                                                              |                         |       |
|     |                   |                                                                                     |                                                                                       |                |                                                                                   | Streptomyces fradiae strain MA7310 | -                                             | MRSA (16-32 µg/ml)                                                                                           |                         |       |
|     |                   |                                                                                     |                                                                                       |                |                                                                                   | Streptomyces canus CA-091830       | sand sample (Kalahari Desert, South Africa)   | inactive                                                                                                     | Signal Peptidase Type I | 79-80 |
| 217 | Ohmyungsa-mycin A |  |                                                                                       |                |                                                                                   |                                    |                                               |                                                                                                              |                         |       |
| 218 | Ohmyungsa-mycin B |                                                                                     |                                                                                       |                |                                                                                   |                                    |                                               |                                                                                                              |                         |       |
|     |                   |                                                                                     |                                                                                       |                |                                                                                   | Streptomyces sp. SNJ042            | Sample from a beach (Jeju, Republic of Korea) | <i>B. subtilis</i> (4.28-34 µg/ml), <i>K. rhizophila</i> (1.07-8.5 µg/ml), <i>P. hauseri</i> (2.14-17 µg/ml) | -                       | 81    |

|     |                |                                                                                                                                                                                                                                                                                                                                               |                                                    |                                                         |                                                                                                                                                                                              |                                        |       |
|-----|----------------|-----------------------------------------------------------------------------------------------------------------------------------------------------------------------------------------------------------------------------------------------------------------------------------------------------------------------------------------------|----------------------------------------------------|---------------------------------------------------------|----------------------------------------------------------------------------------------------------------------------------------------------------------------------------------------------|----------------------------------------|-------|
| 219 | Ecumicin       | <p>217 R<sub>1</sub>=H, R<sub>2</sub>=H, R<sub>3</sub>= CH<sub>3</sub></p> <p>218 R<sub>1</sub>= CH<sub>3</sub>, R<sub>2</sub>=H, R<sub>3</sub>= CH<sub>3</sub></p> <p>219 R<sub>1</sub>= CH<sub>3</sub>, R<sub>2</sub>= CH<sub>3</sub>, R<sub>3</sub>= </p> | <i>Nonomuraea</i><br>sp. MJM5123                   | -                                                       | <i>M. tuberculosis</i> (0.26<br>µg/ml)                                                                                                                                                       | ATPase of<br>ClpC1                     | 82    |
| 220 | Teixobactin    |                                                                                                                                                                                                                                                              | <i>Eleftheria</i><br><i>terrae</i>                 | -                                                       | Gram-positive bacteria<br>(0.005-0.31 µg/ml) and<br>Gram-negative bacteria<br>(2.5-25 µg/ml)                                                                                                 | peptidoglycan<br>synthesis             | 83    |
| 221 | Hypeptin       |                                                                                                                                                                                                                                                              | <i>Lysobacter</i> sp.<br>K5869                     | -                                                       | Gram-positive bacteria<br>(0.0625-16 µg/ml)                                                                                                                                                  | bacterial cell<br>wall<br>biosynthesis | 84    |
| 222 | Clavariopsin A |                                                                                                                                                                                                                                                            | <i>Clavariopsis</i><br><i>aquatica</i><br>AJ117363 | stream sediment sample<br>(Mt. Takao, Tokyo,<br>Japan.) | <i>C. albicans</i> , <i>A. niger</i> , <i>A.</i><br><i>fumigatus</i> , <i>B. cinerea</i> , <i>M.</i><br><i>oryzae</i> , <i>C. orbiculare</i> , <i>A.</i><br><i>alternata</i><br>(2-16 µg/ml) | -                                      | 85-86 |
| 223 | Clavariopsin B | 222 R <sub>1</sub> =CH <sub>3</sub> , R <sub>2</sub> =CH(CH <sub>3</sub> ) <sub>2</sub> , R <sub>3</sub> =CH(CH <sub>3</sub> )C <sub>2</sub> H <sub>5</sub> , R <sub>4</sub> =CH <sub>3</sub> ,<br>R <sub>5</sub> =CH(CH <sub>3</sub> )C <sub>2</sub> H <sub>5</sub> , R <sub>6</sub> =CH <sub>2</sub> CH <sub>2</sub>                        |                                                    |                                                         |                                                                                                                                                                                              |                                        |       |

|     |                |                                                                                                                                                                                                                                                                                                                                                                                                                                                                                                                                                                                                                                                  |                                                                                                                             |                                      |             |          |                                                                   |
|-----|----------------|--------------------------------------------------------------------------------------------------------------------------------------------------------------------------------------------------------------------------------------------------------------------------------------------------------------------------------------------------------------------------------------------------------------------------------------------------------------------------------------------------------------------------------------------------------------------------------------------------------------------------------------------------|-----------------------------------------------------------------------------------------------------------------------------|--------------------------------------|-------------|----------|-------------------------------------------------------------------|
| 224 | Clavariopsin C | 223 R <sub>1</sub> =H, R <sub>2</sub> =CH(CH <sub>3</sub> ) <sub>2</sub> , R <sub>3</sub> =CH(CH <sub>3</sub> )C <sub>2</sub> H <sub>5</sub> , R <sub>4</sub> =CH <sub>3</sub> ,<br>R <sub>5</sub> =CH(CH <sub>3</sub> )C <sub>2</sub> H <sub>5</sub> , R <sub>6</sub> =CH <sub>2</sub> CH <sub>2</sub>                                                                                                                                                                                                                                                                                                                                          |                                                                                                                             |                                      |             |          |                                                                   |
| 225 | Clavariopsin D | 224 R <sub>1</sub> =CH <sub>3</sub> , R <sub>2</sub> =CH(CH <sub>3</sub> ) <sub>2</sub> , R <sub>3</sub> =CH(CH <sub>3</sub> )C <sub>2</sub> H <sub>5</sub> , R <sub>4</sub> =H,<br>R <sub>5</sub> =CH(CH <sub>3</sub> )C <sub>2</sub> H <sub>5</sub> , R <sub>6</sub> =CH <sub>2</sub> CH <sub>2</sub>                                                                                                                                                                                                                                                                                                                                          |                                                                                                                             |                                      |             |          |                                                                   |
| 226 | Clavariopsin E | 225 R <sub>1</sub> =CH <sub>3</sub> , R <sub>2</sub> =CH(CH <sub>3</sub> ) <sub>2</sub> , R <sub>3</sub> =CH(CH <sub>3</sub> ) <sub>2</sub> , R <sub>4</sub> =CH <sub>3</sub> ,<br>R <sub>5</sub> =CH(CH <sub>3</sub> )C <sub>2</sub> H <sub>5</sub> , R <sub>6</sub> =CH <sub>2</sub> CH <sub>2</sub>                                                                                                                                                                                                                                                                                                                                           |                                                                                                                             |                                      |             |          |                                                                   |
| 227 | Clavariopsin F | 226 R <sub>1</sub> =CH <sub>3</sub> , R <sub>2</sub> =CH(CH <sub>3</sub> ) <sub>2</sub> , R <sub>3</sub> =CH(CH <sub>3</sub> )C <sub>2</sub> H <sub>5</sub> , R <sub>4</sub> =CH <sub>3</sub> ,<br>R <sub>5</sub> =CH(CH <sub>3</sub> ) <sub>2</sub> , R <sub>6</sub> =CH <sub>2</sub> CH <sub>2</sub>                                                                                                                                                                                                                                                                                                                                           |                                                                                                                             |                                      |             |          |                                                                   |
| 228 | Clavariopsin G | 227 R <sub>1</sub> =CH <sub>3</sub> , R <sub>2</sub> =CH(CH <sub>3</sub> ) <sub>2</sub> , R <sub>3</sub> =CH <sub>2</sub> CH(CH <sub>3</sub> ) <sub>2</sub> , R <sub>4</sub> =CH <sub>3</sub> ,<br>R <sub>5</sub> =CH(CH <sub>3</sub> )C <sub>2</sub> H <sub>5</sub> , R <sub>6</sub> =CH <sub>2</sub> CH <sub>2</sub>                                                                                                                                                                                                                                                                                                                           |                                                                                                                             |                                      |             |          |                                                                   |
| 229 | Clavariopsin H | 228 R <sub>1</sub> =CH <sub>3</sub> , R <sub>2</sub> =CH(CH <sub>3</sub> ) <sub>2</sub> , R <sub>3</sub> =CH(CH <sub>3</sub> )C <sub>2</sub> H <sub>5</sub> , R <sub>4</sub> =CH <sub>3</sub> ,<br>R <sub>5</sub> =CH <sub>2</sub> CH(CH <sub>3</sub> ) <sub>2</sub> , R <sub>6</sub> =CH <sub>2</sub> CH <sub>2</sub>                                                                                                                                                                                                                                                                                                                           |                                                                                                                             |                                      |             |          |                                                                   |
| 230 | Clavariopsin I | 229 R <sub>1</sub> =CH <sub>3</sub> , R <sub>2</sub> =CH(CH <sub>3</sub> ) <sub>2</sub> , R <sub>3</sub> =CH(CH <sub>3</sub> )C <sub>2</sub> H <sub>5</sub> , R <sub>4</sub> =CH <sub>3</sub> ,<br>R <sub>5</sub> =CH(CH <sub>3</sub> )C <sub>2</sub> H <sub>5</sub> , R <sub>6</sub> =CH <sub>2</sub><br>230 R <sub>1</sub> =CH <sub>3</sub> , R <sub>2</sub> =CH <sub>2</sub> CH(CH <sub>3</sub> ) <sub>2</sub> , R <sub>3</sub> =CH(CH <sub>3</sub> )C <sub>2</sub> H <sub>5</sub> ,<br>R <sub>4</sub> =CH <sub>3</sub> , R <sub>5</sub> =CH(CH <sub>3</sub> )C <sub>2</sub> H <sub>5</sub> , R <sub>6</sub> =CH <sub>2</sub> CH <sub>2</sub> |                                                                                                                             |                                      |             |          |                                                                   |
| 231 | Ulleungamide A | 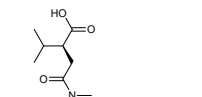                                                                                                                                                                                                                                                                                                                                                                                                                                                                                                                                                               | 231 R <sub>1</sub> -R <sub>2</sub> =<br>  |                                      |             |          | <i>S. aureus</i> (25 µg/disk), <i>S. typhimurium</i> (50 µg/disk) |
| 232 | Ulleungamide B |                                                                                                                                                                                                                                                                                                                                                                                                                                                                                                                                                               | 232 R <sub>1</sub> -R <sub>2</sub> =<br> | <i>Streptomyces</i><br>sp. KCB13F003 | Soil sample | inactive | - 87-88                                                           |
| 233 | Ulleungamide C |                                                                                                                                                                                                                                                                                                                                                                                                                                                                                                                                                               | 233 R <sub>1</sub> -R <sub>2</sub> =<br> |                                      |             | N/A      |                                                                   |

*B. cinerea* (0.01-0.3  
µg/disk), *A. alternata*  
(0.3-3 µg/disk)

*S. aureus* (25 µg/disk), *S.*  
*typhimurium* (50 µg/disk)

|                              |              |                                                                                     |                                                                                                                                             |                                               |                                                                                                                                                                                                                                |                                                                    |                                             |    |
|------------------------------|--------------|-------------------------------------------------------------------------------------|---------------------------------------------------------------------------------------------------------------------------------------------|-----------------------------------------------|--------------------------------------------------------------------------------------------------------------------------------------------------------------------------------------------------------------------------------|--------------------------------------------------------------------|---------------------------------------------|----|
| 234                          | Ambobactin   | 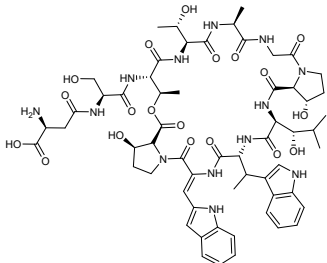   | <i>Streptomyces ambofaciens</i> F3                                                                                                          | an endophyte of <i>Platyclusus orientalis</i> | <i>B. subtilis</i> , <i>B. cereus</i> , <i>S. aureus</i> , <i>E. coli</i> , <i>E. carotovora</i> , <i>P. syringae</i> pv. <i>Actinidiae</i> , <i>A. solanacearum</i> , <i>X. oryzae</i> pv. <i>Oryzae</i> .<br>(3.13-25 µg/ml) | -                                                                  | 89                                          |    |
| 235                          | Evybactin    |    | <i>P. noenieputensis</i> DSM 25462                                                                                                          | -                                             | <i>M. tuberculosis</i> (0.0625-64 µg/ml), <i>E. coli</i> (0.0625-16 µg/ml)                                                                                                                                                     | DNA gyrase                                                         | 90                                          |    |
| <b>4 Cyclic lipopeptides</b> |              |                                                                                     |                                                                                                                                             |                                               |                                                                                                                                                                                                                                |                                                                    |                                             |    |
| 236                          | Glycinocin A |   | 236 R <sub>1</sub> =  , R <sub>2</sub> =CH <sub>3</sub>   | <i>Actinomycete</i> AW998                     | -                                                                                                                                                                                                                              | <i>S. aureus</i> (5.5-17 µg/ml), <i>B. subtilis</i> (8.3-17 µg/ml) | lipid carrier undecylenyl phosphate (C55-P) | 91 |
| 237                          | Glycinocin B |  | 237 R <sub>1</sub> =  , R <sub>2</sub> = CH <sub>3</sub> | <i>Actinomycete</i> AW998                     | -                                                                                                                                                                                                                              | <i>S. aureus</i> (5.5-17 µg/ml), <i>B. subtilis</i> (8.3-17 µg/ml) | lipid carrier undecylenyl phosphate (C55-P) | 91 |
| 238                          | Glycinocin C |  | 238 R <sub>1</sub> =  , R <sub>2</sub> = CH <sub>3</sub> | <i>Actinomycete</i> AW998                     | -                                                                                                                                                                                                                              | <i>S. aureus</i> (5.5-17 µg/ml), <i>B. subtilis</i> (8.3-17 µg/ml) | lipid carrier undecylenyl phosphate (C55-P) | 91 |
| 239                          | Glycinocin D |  | 239 R <sub>1</sub> =  , R <sub>2</sub> =H                | <i>Actinomycete</i> AW998                     | -                                                                                                                                                                                                                              | <i>S. aureus</i> (5.5-17 µg/ml), <i>B. subtilis</i> (8.3-17 µg/ml) | lipid carrier undecylenyl phosphate (C55-P) | 91 |

|     |               |                                                                                                                                                                                                                                                                                                                                                                        |                                                   |                       |                                                                          |                                                      |       |
|-----|---------------|------------------------------------------------------------------------------------------------------------------------------------------------------------------------------------------------------------------------------------------------------------------------------------------------------------------------------------------------------------------------|---------------------------------------------------|-----------------------|--------------------------------------------------------------------------|------------------------------------------------------|-------|
| 240 | Friulimicin A | 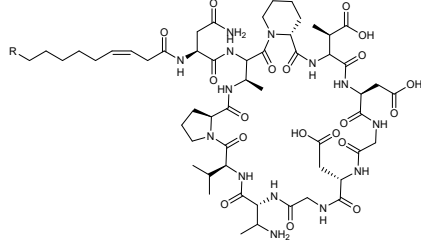                                                                                                                                                                                                                                                                                      | <i>Actinoplanes<br/>friuliensis</i><br>HAG01 0964 | -                     | N/A                                                                      | lipid carrier<br>undecylenyl<br>phosphate<br>(C55-P) | 92    |
| 241 | Friulimicin B |                                                                                                                                                                                                                                                                                                                                                                        |                                                   |                       | <i>S. simulans</i> (0.078<br>μg/ml), <i>B. subtilis</i> (0.078<br>μg/ml) |                                                      |       |
| 242 | Friulimicin C |                                                                                                                                                                                                                                                                                                                                                                        |                                                   |                       | N/A                                                                      |                                                      |       |
| 243 | Friulimicin D | 240 R=  241 R= <br>242 R=  243 R=  |                                                   |                       |                                                                          |                                                      |       |
| 244 | Taromycin A   |                                                                                                                                                                                                                                                                                      | <i>Saccharomonos<br/>pora</i> sp. CNQ-<br>490     | marine-derived sample | MRSA (12 μg/ml), <i>E.<br/>faecalis</i> (6-50 μg/ml)                     | -                                                    | 93-94 |
| 245 | Taromycin B   |                                                                                                                                                                                                                                                                                                                                                                        |                                                   |                       |                                                                          |                                                      |       |

|     |             |                                                                                    |                       |                                                                                                               |                         |                                                                                                                                                                          |                                        |    |
|-----|-------------|------------------------------------------------------------------------------------|-----------------------|---------------------------------------------------------------------------------------------------------------|-------------------------|--------------------------------------------------------------------------------------------------------------------------------------------------------------------------|----------------------------------------|----|
| 246 | Malacidin A | 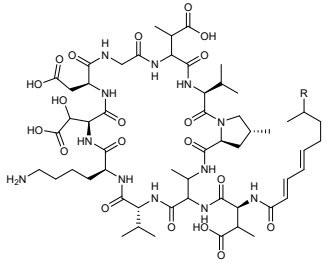  | 246 R=Me              | heterologous expression in <i>Streptomyces albus</i> J1074 (cosmids DFD0097-644, DFD0097-735 and DFD0097-388) | soil sample (USA)       | multidrug-resistant Gram-positive pathogens (0.1-2 µg/ml)                                                                                                                | cell wall synthesis precursor lipid II | 95 |
| 247 | Malacidin B |                                                                                    | 247 R=Et              |                                                                                                               |                         | N/A                                                                                                                                                                      |                                        |    |
| 248 | Cadaside A  |   | 248 R=CH <sub>3</sub> | heterologous expression in <i>Streptomyces albus</i> J1074 (cosmids DFD0097-431, DFD0097-157, DFD0097-262)    | soil sample (Australia) | <i>S. aureus</i> (1 µg/ml), <i>E. faecalis</i> (4 µg/ml)                                                                                                                 | cell wall synthesis                    | 96 |
| 249 | Cadaside B  |                                                                                    | 249 R=H               |                                                                                                               |                         |                                                                                                                                                                          |                                        |    |
| 250 | Lysocin E   |  |                       | <i>Lysobacter</i> sp. RH2180-5                                                                                | soil sample (Japan)     | <i>S. aureus</i> , <i>S. simulans</i> , <i>S. haemolyticus</i> , <i>S. pseudintermedius</i> , <i>B. subtilis</i> , <i>B. cereus</i> , <i>L. monocytogene</i> (1-4 µg/ml) | menaquinone on the cell membrane       | 97 |
| 251 | Lysocin I   |                                                                                    | 251 R=Me              | <i>Lysobacter enzymogenes</i>                                                                                 | -                       | <i>M. smegmatis</i> (8 µg/ml), <i>S. aureus</i> (1-4 µg/ml), <i>S. epidermidis</i> (1 µg/ml)                                                                             | -                                      | 98 |
| 252 | Lysocin J   |                                                                                    | 252 R=Et              |                                                                                                               |                         |                                                                                                                                                                          |                                        |    |



|     |             |                                                                                    |                                      |                                                                      |                                                                                                                  |                                        |                 |  |
|-----|-------------|------------------------------------------------------------------------------------|--------------------------------------|----------------------------------------------------------------------|------------------------------------------------------------------------------------------------------------------|----------------------------------------|-----------------|--|
| 253 | WAP-8294A1  | 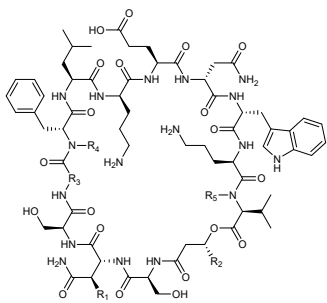  | <i>Lysobacter</i><br>WAP-8294        | Soil sample (Shimoda<br>City, Shizuoka Prefecture,<br>Japan)         | MRSA, <i>S. aureus</i> ,<br><i>S. epidermidis</i> , <i>B. subtilis</i> ,<br><i>E. faecium</i><br>(0.39-25 µg/ml) | menaquinone<br>on the cell<br>membrane | 99              |  |
| 254 | WAP-8294A2  |                                                                                    |                                      |                                                                      |                                                                                                                  |                                        |                 |  |
| 255 | WAP-8294A4  |                                                                                    |                                      |                                                                      |                                                                                                                  |                                        |                 |  |
| 256 | WAP-8294A8  |                                                                                    |                                      |                                                                      |                                                                                                                  |                                        |                 |  |
| 257 | WAP-8294A9  |                                                                                    |                                      |                                                                      |                                                                                                                  |                                        |                 |  |
|     |             | R <sub>1</sub>                                                                     | R <sub>2</sub>                       | R <sub>3</sub>                                                       | R <sub>4</sub>                                                                                                   | R <sub>5</sub>                         |                 |  |
|     |             | 253                                                                                | OH                                   | (CH <sub>2</sub> ) <sub>4</sub> CH <sub>3</sub>                      | CH <sub>2</sub>                                                                                                  | CH <sub>3</sub>                        | CH <sub>3</sub> |  |
| 258 | WAP-8294A13 | 254                                                                                | OH                                   | (CH <sub>2</sub> ) <sub>3</sub> CH(CH <sub>3</sub> ) <sub>2</sub>    | CH <sub>2</sub>                                                                                                  | CH <sub>3</sub>                        | CH <sub>3</sub> |  |
|     |             | 255                                                                                | OH                                   | (CH <sub>2</sub> ) <sub>4</sub> CH(CH <sub>3</sub> ) <sub>2</sub>    | CH <sub>2</sub>                                                                                                  | CH <sub>3</sub>                        | CH <sub>3</sub> |  |
|     |             | 256                                                                                | OH                                   | ((CH <sub>2</sub> ) <sub>3</sub> CH(CH <sub>3</sub> ) <sub>2</sub> ) | CH <sub>2</sub>                                                                                                  | CH <sub>3</sub>                        | H               |  |
|     |             | 257                                                                                | OH                                   | (CH <sub>2</sub> ) <sub>3</sub> CH(CH <sub>3</sub> ) <sub>2</sub>    | (CH <sub>2</sub> ) <sub>2</sub>                                                                                  | H                                      | CH <sub>3</sub> |  |
|     |             | 258                                                                                | OH                                   | (CH <sub>2</sub> ) <sub>3</sub> CH(CH <sub>3</sub> ) <sub>2</sub>    | CH <sub>2</sub>                                                                                                  | CH <sub>3</sub>                        | CH <sub>3</sub> |  |
| 259 | WBP-29479A1 |  | <i>L. antibioticus</i><br>ATCC 29479 | -                                                                    | <i>S. aureus</i> (0.25-8 µg/ml)                                                                                  | -                                      | 100             |  |
|     |             |                                                                                    |                                      |                                                                      |                                                                                                                  |                                        |                 |  |

|     |                 |                                                                                    |                                                   |   |                                          |             |     |
|-----|-----------------|------------------------------------------------------------------------------------|---------------------------------------------------|---|------------------------------------------|-------------|-----|
| 260 | MBA1 wameb      | 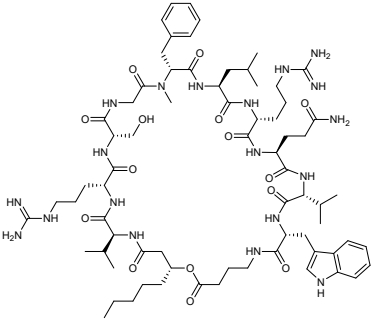  | synthetic<br>bioinformatic<br>natural<br>products | - | Gram-positive bacteria<br>(0.5-64 µg/ml) | menaquinone | 101 |
| 261 | MBA2 lysomeb    |   | synthetic<br>bioinformatic<br>natural<br>products | - | Gram-positive bacteria<br>(0.5-64 µg/ml) | menaquinone | 101 |
| 262 | MBA3<br>metameb |  | synthetic<br>bioinformatic<br>natural<br>products | - | Gram-positive bacteria<br>(0.5-64 µg/ml) | menaquinone | 101 |

263 MBA4 alcameb

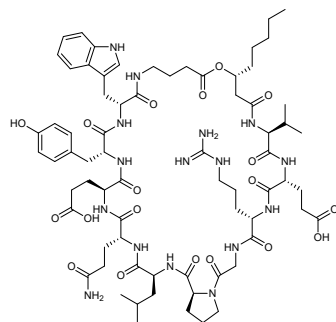

synthetic  
bioinformatic  
natural  
products

-

264 MBA5 tabameb

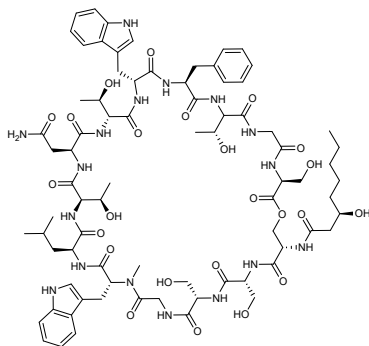

synthetic  
bioinformatic  
natural  
products

-

265 MBA6  
mobimeb

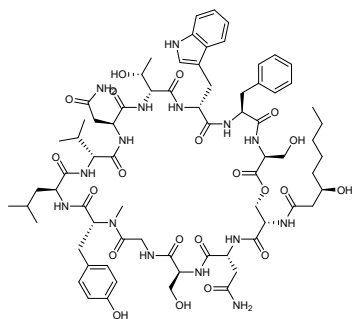

synthetic  
bioinformatic  
natural  
products

-

|     |                     |                                                                                    |                     |                                                  |             |         |                                                                                                                                                                                                                                   |                                                                                                                                                 |
|-----|---------------------|------------------------------------------------------------------------------------|---------------------|--------------------------------------------------|-------------|---------|-----------------------------------------------------------------------------------------------------------------------------------------------------------------------------------------------------------------------------------|-------------------------------------------------------------------------------------------------------------------------------------------------|
| 266 | Burkholdine<br>1229 | 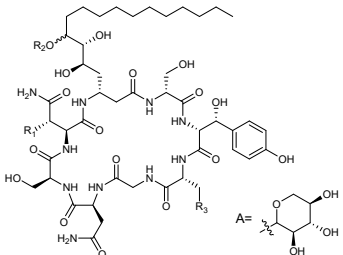  | <i>Burkholderia</i> | Soil sample (Pennsylvania State University, USA) | -           | 102-103 | <i>P. infestans</i> , <i>A. solani</i> , <i>B. cinerea</i> , <i>M. figiensis</i> , <i>S. cerevisiae</i> , <i>A. niger</i> , <i>C. albicans</i><br>(0.4-12.5 µg/ml)                                                                |                                                                                                                                                 |
| 267 | Burkholdine<br>1097 |                                                                                    |                     |                                                  |             |         |                                                                                                                                                                                                                                   |                                                                                                                                                 |
| 268 | Burkholdine<br>1119 |                                                                                    |                     |                                                  |             |         |                                                                                                                                                                                                                                   | 266 R <sub>1</sub> =OH, R <sub>2</sub> =β-A, R <sub>3</sub> =  |
| 269 | Burkholdine<br>1213 |                                                                                    |                     |                                                  |             |         |                                                                                                                                                                                                                                   | 267 R <sub>1</sub> =OH, R <sub>2</sub> =H, R <sub>3</sub> =    |
| 270 | Burkholdine<br>1215 |                                                                                    |                     |                                                  |             |         |                                                                                                                                                                                                                                   | 268 R <sub>1</sub> =OH, R <sub>2</sub> =α-A, R <sub>3</sub> =  |
| 271 | Occidiofungin A     |  | <i>Burkholderia</i> | MS14                                             | soil sample | 104-105 | <i>R. solani</i> , <i>A. fumigatus</i> , <i>A. niger</i> , <i>M. gypseum</i> , <i>T. mentagrophytes</i> , <i>A. alternata</i> , <i>M. phaseolina</i> , <i>G. candidum</i> , <i>P. spinosum</i> , <i>P. ultimum</i><br>(1-8 µg/ml) |                                                                                                                                                 |
| 272 | Occidiofungin B     |                                                                                    |                     |                                                  |             |         |                                                                                                                                                                                                                                   | 271 R <sub>1</sub> =H, R <sub>2</sub> =H                                                                                                        |
| 273 | Occidiofungin C     |                                                                                    |                     |                                                  |             |         |                                                                                                                                                                                                                                   | 272 R <sub>1</sub> =OH, R <sub>2</sub> =H                                                                                                       |
| 274 | Occidiofungin D     |                                                                                    |                     |                                                  |             |         |                                                                                                                                                                                                                                   | 273 R <sub>1</sub> =H, R <sub>2</sub> =Cl                                                                                                       |

|     |               |                                                                                                   |                                                         |                                                                            |                                                                                                              |   |                                                                  |                |
|-----|---------------|---------------------------------------------------------------------------------------------------|---------------------------------------------------------|----------------------------------------------------------------------------|--------------------------------------------------------------------------------------------------------------|---|------------------------------------------------------------------|----------------|
| 275 | Gausemycin A  | 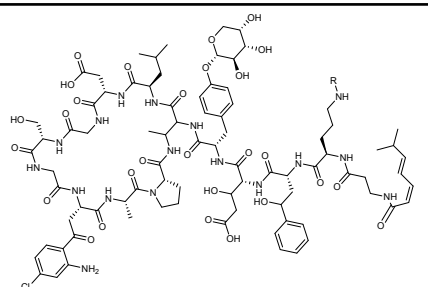                 | <i>Streptomyces</i><br>sp. INA-Ac-5812                  | -                                                                          | <i>Staphylococcus</i> sp.<br>(0.125-1 µg/ml)                                                                 | - | 106                                                              |                |
| 276 | Gausemycin B  |                                                                                                   |                                                         |                                                                            |                                                                                                              |   |                                                                  |                |
|     |               | 275 R=H                                                                                           | 276 R=COCH <sub>2</sub> CH <sub>2</sub> NH <sub>2</sub> |                                                                            |                                                                                                              |   |                                                                  |                |
| 277 | Hassallidin A |                  | <i>Hassallia</i> sp.<br><i>B0207</i>                    | Sample from epilithic<br>cyanobacterium (Orrido<br>Clough, Bellano, Italy) | <i>A. fumigatus</i> (4.8 µg/ml),<br><i>C. albicans</i> (4.8 µg/ml), <i>C.</i><br><i>neoformans</i> (8 µg/ml) | - |                                                                  |                |
| 278 | Hassallidin B |                                                                                                   |                                                         |                                                                            |                                                                                                              |   |                                                                  |                |
| 279 | Hassallidin C | <b>277</b><br>   |                                                         |                                                                            | N/A                                                                                                          |   | 107-110                                                          |                |
| 280 | Hassallidin D | <b>278</b><br>  |                                                         |                                                                            | <i>Anabaena</i> sp.<br>SYKE748A                                                                              | - | <i>C. albicans</i> (1.5 µm), <i>C.</i><br><i>krusei</i> (1.5 µm) | cell membranes |
| 281 | Hassallidin E | <b>279</b><br> |                                                         | H or acetyl                                                                | Planktothrix<br>serta PCC 8927                                                                               | - | <i>C. albicans</i> (23 µm)                                       | -              |
|     |               | <b>280</b><br> |                                                         | H or acetyl                                                                |                                                                                                              |   |                                                                  |                |

|  |     |                           |                                                                                     |         |                                                   |                                           |                                                                                                                                                                     |                                                                |     |
|--|-----|---------------------------|-------------------------------------------------------------------------------------|---------|---------------------------------------------------|-------------------------------------------|---------------------------------------------------------------------------------------------------------------------------------------------------------------------|----------------------------------------------------------------|-----|
|  | 281 | OH                        |    | H       |                                                   |                                           |                                                                                                                                                                     |                                                                |     |
|  | 282 | Cepacidine A <sub>1</sub> |    |         | <i>Pseudomonas cepacia</i> AF 2001.               | Soil sample (Munchon, Kyunggi-Do, Korea.) | <i>C. albicans</i> , <i>C. glabrata</i> , <i>C. neoformans</i> , <i>S. cerevisiae</i> , <i>A. niger</i> , <i>M. canis</i> , <i>T. rubrum</i><br>(0.049-0.391 µg/ml) | -                                                              | 111 |
|  | 283 | Cepacidine A <sub>2</sub> |    |         |                                                   |                                           |                                                                                                                                                                     |                                                                |     |
|  |     |                           | 282 R=OH                                                                            | 283 R=H |                                                   |                                           |                                                                                                                                                                     |                                                                |     |
|  | 284 | Macolacin                 |    |         | synthetic<br>bioinformatic<br>natural<br>products |                                           | Gram-negative bacteria<br>(1-8 µg/ml), colistin-resistant pathogens (2-4 µg/ml)                                                                                     | lipid A                                                        | 112 |
|  | 285 | Biphenyl-macolacin        |    |         | Semi-synthesis                                    |                                           |                                                                                                                                                                     |                                                                |     |
|  |     |                           | 284 R=                                                                              | 285 R=  |                                                   |                                           |                                                                                                                                                                     |                                                                |     |
|  | 286 | Cilagicin                 |  |         | <i>Paenibacillus mucilaginosus</i> KNP414 and K02 |                                           | Gram-positive bacteria<br>(0.125-2 µg/ml)                                                                                                                           | Undecaprenyl phosphate and Undecaprenyl pyrophosphate (C55-PP) | 113 |

| <b>287</b>      | Iturin F1      | 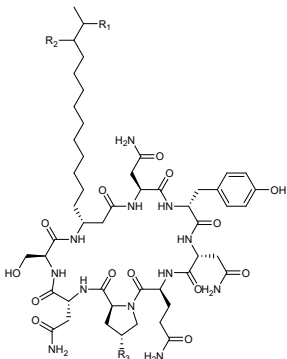 | <b>287</b> R <sub>1</sub> =CH <sub>3</sub> ,<br>R <sub>2</sub> =H, R <sub>3</sub> =OH                                                                                                                                                                                                                                                                                                                                                                                                                                                                                                                                                                                                                                                                                                                                                                                                       | <i>Bacillus</i> sp.<br>KCB14S006 | saline water sample<br>(Incheon, Korea)                                             | <i>A. flavus</i> , <i>N. crassa</i> , <i>C. albicans</i> , <i>P. griseofulvum</i> ,<br><i>C. tropicalis</i><br>(3.125-12.5 µg/ml) | -              | 114 |   |   |                                                                                   |   |   |   |                                                                                    |   |   |   |                                                                                     |   |   |   |                                                                                     |                 |   |   |                                                                                     |                                    |                                                   |                                                                |                                         |     |
|-----------------|----------------|-----------------------------------------------------------------------------------|---------------------------------------------------------------------------------------------------------------------------------------------------------------------------------------------------------------------------------------------------------------------------------------------------------------------------------------------------------------------------------------------------------------------------------------------------------------------------------------------------------------------------------------------------------------------------------------------------------------------------------------------------------------------------------------------------------------------------------------------------------------------------------------------------------------------------------------------------------------------------------------------|----------------------------------|-------------------------------------------------------------------------------------|-----------------------------------------------------------------------------------------------------------------------------------|----------------|-----|---|---|-----------------------------------------------------------------------------------|---|---|---|------------------------------------------------------------------------------------|---|---|---|-------------------------------------------------------------------------------------|---|---|---|-------------------------------------------------------------------------------------|-----------------|---|---|-------------------------------------------------------------------------------------|------------------------------------|---------------------------------------------------|----------------------------------------------------------------|-----------------------------------------|-----|
| <b>288</b>      | Iturin F2      |                                                                                   | <b>288</b> R <sub>1</sub> =H,<br>R <sub>2</sub> =CH <sub>3</sub> , R <sub>3</sub> =OH                                                                                                                                                                                                                                                                                                                                                                                                                                                                                                                                                                                                                                                                                                                                                                                                       |                                  |                                                                                     |                                                                                                                                   |                |     |   |   |                                                                                   |   |   |   |                                                                                    |   |   |   |                                                                                     |   |   |   |                                                                                     |                 |   |   |                                                                                     |                                    |                                                   |                                                                |                                         |     |
| <b>289</b>      | Iturin A8      |                                                                                   | <b>289</b> R <sub>1</sub> =CH <sub>3</sub> ,<br>R <sub>2</sub> =H, R <sub>3</sub> =H                                                                                                                                                                                                                                                                                                                                                                                                                                                                                                                                                                                                                                                                                                                                                                                                        |                                  |                                                                                     |                                                                                                                                   |                |     |   |   |                                                                                   |   |   |   |                                                                                    |   |   |   |                                                                                     |   |   |   |                                                                                     |                 |   |   |                                                                                     |                                    |                                                   |                                                                |                                         |     |
| <b>290</b>      | Iturin A9      |                                                                                   | <b>290</b> R <sub>1</sub> =H,<br>R <sub>2</sub> =CH <sub>3</sub> , R <sub>3</sub> =H                                                                                                                                                                                                                                                                                                                                                                                                                                                                                                                                                                                                                                                                                                                                                                                                        |                                  |                                                                                     |                                                                                                                                   |                |     |   |   |                                                                                   |   |   |   |                                                                                    |   |   |   |                                                                                     |   |   |   |                                                                                     |                 |   |   |                                                                                     |                                    |                                                   |                                                                |                                         |     |
| <b>291</b>      | Arylomycin A1  |  | <table border="1"> <thead> <tr> <th>R<sub>1</sub></th> <th>R<sub>2</sub></th> <th>R<sub>3</sub></th> <th>R<sub>4</sub></th> </tr> </thead> <tbody> <tr> <td>H</td> <td>H</td> <td>H</td> <td></td> </tr> <tr> <td>H</td> <td>H</td> <td>H</td> <td></td> </tr> <tr> <td>H</td> <td>H</td> <td>H</td> <td></td> </tr> <tr> <td>H</td> <td>H</td> <td>H</td> <td></td> </tr> <tr> <td>NO<sub>2</sub></td> <td>H</td> <td>H</td> <td></td> </tr> </tbody> </table> | R <sub>1</sub>                   | R <sub>2</sub>                                                                      | R <sub>3</sub>                                                                                                                    | R <sub>4</sub> | H   | H | H |  | H | H | H |  | H | H | H |  | H | H | H |  | NO <sub>2</sub> | H | H |  | <i>Streptomyces</i><br>sp. TŪ 6075 | Soil sample (rain forest at<br>Cape Coast, Ghana) | Gram-negative and<br>gram-positive bacteria<br>(0.25-16 µg/ml) | Signal<br>Peptidase Type<br>I (SPase I) | 115 |
| R <sub>1</sub>  | R <sub>2</sub> |                                                                                   |                                                                                                                                                                                                                                                                                                                                                                                                                                                                                                                                                                                                                                                                                                                                                                                                                                                                                             | R <sub>3</sub>                   | R <sub>4</sub>                                                                      |                                                                                                                                   |                |     |   |   |                                                                                   |   |   |   |                                                                                    |   |   |   |                                                                                     |   |   |   |                                                                                     |                 |   |   |                                                                                     |                                    |                                                   |                                                                |                                         |     |
| H               | H              |                                                                                   |                                                                                                                                                                                                                                                                                                                                                                                                                                                                                                                                                                                                                                                                                                                                                                                                                                                                                             | H                                |    |                                                                                                                                   |                |     |   |   |                                                                                   |   |   |   |                                                                                    |   |   |   |                                                                                     |   |   |   |                                                                                     |                 |   |   |                                                                                     |                                    |                                                   |                                                                |                                         |     |
| H               | H              |                                                                                   |                                                                                                                                                                                                                                                                                                                                                                                                                                                                                                                                                                                                                                                                                                                                                                                                                                                                                             | H                                |   |                                                                                                                                   |                |     |   |   |                                                                                   |   |   |   |                                                                                    |   |   |   |                                                                                     |   |   |   |                                                                                     |                 |   |   |                                                                                     |                                    |                                                   |                                                                |                                         |     |
| H               | H              |                                                                                   |                                                                                                                                                                                                                                                                                                                                                                                                                                                                                                                                                                                                                                                                                                                                                                                                                                                                                             | H                                |  |                                                                                                                                   |                |     |   |   |                                                                                   |   |   |   |                                                                                    |   |   |   |                                                                                     |   |   |   |                                                                                     |                 |   |   |                                                                                     |                                    |                                                   |                                                                |                                         |     |
| H               | H              |                                                                                   |                                                                                                                                                                                                                                                                                                                                                                                                                                                                                                                                                                                                                                                                                                                                                                                                                                                                                             | H                                |  |                                                                                                                                   |                |     |   |   |                                                                                   |   |   |   |                                                                                    |   |   |   |                                                                                     |   |   |   |                                                                                     |                 |   |   |                                                                                     |                                    |                                                   |                                                                |                                         |     |
| NO <sub>2</sub> | H              |                                                                                   |                                                                                                                                                                                                                                                                                                                                                                                                                                                                                                                                                                                                                                                                                                                                                                                                                                                                                             | H                                |  |                                                                                                                                   |                |     |   |   |                                                                                   |   |   |   |                                                                                    |   |   |   |                                                                                     |   |   |   |                                                                                     |                 |   |   |                                                                                     |                                    |                                                   |                                                                |                                         |     |
| <b>292</b>      | Arylomycin A2  |                                                                                   |                                                                                                                                                                                                                                                                                                                                                                                                                                                                                                                                                                                                                                                                                                                                                                                                                                                                                             |                                  |                                                                                     |                                                                                                                                   |                |     |   |   |                                                                                   |   |   |   |                                                                                    |   |   |   |                                                                                     |   |   |   |                                                                                     |                 |   |   |                                                                                     |                                    |                                                   |                                                                |                                         |     |
| <b>293</b>      | Arylomycin A3  | <b>291</b>                                                                        |                                                                                                                                                                                                                                                                                                                                                                                                                                                                                                                                                                                                                                                                                                                                                                                                                                                                                             |                                  |                                                                                     |                                                                                                                                   |                |     |   |   |                                                                                   |   |   |   |                                                                                    |   |   |   |                                                                                     |   |   |   |                                                                                     |                 |   |   |                                                                                     |                                    |                                                   |                                                                |                                         |     |
| <b>294</b>      | Arylomycin A4  | <b>292</b>                                                                        |                                                                                                                                                                                                                                                                                                                                                                                                                                                                                                                                                                                                                                                                                                                                                                                                                                                                                             |                                  |                                                                                     |                                                                                                                                   |                |     |   |   |                                                                                   |   |   |   |                                                                                    |   |   |   |                                                                                     |   |   |   |                                                                                     |                 |   |   |                                                                                     |                                    |                                                   |                                                                |                                         |     |
| <b>295</b>      | Arylomycin A5  | <b>293</b><br><b>294</b>                                                          |                                                                                                                                                                                                                                                                                                                                                                                                                                                                                                                                                                                                                                                                                                                                                                                                                                                                                             |                                  |                                                                                     |                                                                                                                                   |                |     |   |   |                                                                                   |   |   |   |                                                                                    |   |   |   |                                                                                     |   |   |   |                                                                                     |                 |   |   |                                                                                     |                                    |                                                   |                                                                |                                         |     |
| <b>296</b>      | Arylomycin B1  | <b>295</b>                                                                        |                                                                                                                                                                                                                                                                                                                                                                                                                                                                                                                                                                                                                                                                                                                                                                                                                                                                                             |                                  |                                                                                     |                                                                                                                                   |                |     |   |   |                                                                                   |   |   |   |                                                                                    |   |   |   |                                                                                     |   |   |   |                                                                                     |                 |   |   |                                                                                     |                                    |                                                   |                                                                |                                         |     |
| <b>297</b>      | Arylomycin B2  | <b>296</b>                                                                        |                                                                                                                                                                                                                                                                                                                                                                                                                                                                                                                                                                                                                                                                                                                                                                                                                                                                                             |                                  |                                                                                     |                                                                                                                                   |                |     |   |   |                                                                                   |   |   |   |                                                                                    |   |   |   |                                                                                     |   |   |   |                                                                                     |                 |   |   |                                                                                     |                                    |                                                   |                                                                |                                         |     |

|     |               |     |                 |                                                                                     |    |                                                                                      |                                     |   |
|-----|---------------|-----|-----------------|-------------------------------------------------------------------------------------|----|--------------------------------------------------------------------------------------|-------------------------------------|---|
| 298 | Arylomycin B3 | 297 | NO <sub>2</sub> | H                                                                                   | H  |     |                                     |   |
| 299 | Arylomycin B4 | 298 | NO <sub>2</sub> | H                                                                                   | H  |     |                                     |   |
|     |               | 299 | NO <sub>2</sub> | H                                                                                   | H  |     |                                     |   |
| 300 | Arylomycin B5 | 300 | NO <sub>2</sub> | H                                                                                   | H  |     |                                     |   |
| 301 | Arylomycin B6 | 301 | NO <sub>2</sub> | H                                                                                   | H  |     |                                     |   |
| 302 | Arylomycin B7 | 302 | NO <sub>2</sub> | H                                                                                   | H  |     |                                     |   |
| 303 | Arylomycin C1 | 303 | H               |    | OH |    |                                     |   |
| 304 | Arylomycin C2 | 304 | H               |    | OH |    |                                     |   |
| 305 | Arylomycin C3 | 305 | H               |    | H  |     |                                     |   |
| 306 | Arylomycin C4 | 306 | H               |   | OH |   | <i>Streptomyces</i><br>sp. PTA-3546 | - |
| 307 | Arylomycin C5 | 307 | H               |  | H  |  |                                     |   |
| 308 | Arylomycin C6 | 308 | H               |  | H  |   |                                     |   |
| 309 | Arylomycin C7 | 309 | H               |  | H  |   |                                     |   |



|     |               |     |   |                                                                                     |                                          |                                                                            |                                                                                                 |     |     |
|-----|---------------|-----|---|-------------------------------------------------------------------------------------|------------------------------------------|----------------------------------------------------------------------------|-------------------------------------------------------------------------------------------------|-----|-----|
| 310 | Arylomycin C8 | 310 | H | 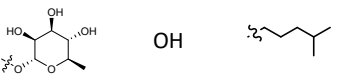   |                                          |                                                                            |                                                                                                 |     |     |
| 311 | Arylomycin D  |     |   |    | <i>Actinoplanes ferrugineus</i><br>MA738 | -                                                                          |                                                                                                 | 79  |     |
| 312 | M131          |     |   |    |                                          |                                                                            |                                                                                                 |     |     |
| 313 | G0775         |     |   |   | Total synthesis                          | -                                                                          |                                                                                                 | 117 |     |
| 314 | Vinylamycin   | 314 |   |  | <i>Streptomyces</i><br>sp.<br>MI982-63F1 | Soil sample (Institute of Microbial Chemistry, Shinagawa-ku, Tokyo, Japan) | <i>S. aureus</i> , <i>M. luteus</i> , <i>B. subtilis</i> , <i>C. bovis</i><br>(1.56-12.5 µg/ml) | -   | 118 |

|     |                      |                                                                                     |                                                         |                                  |                                                                                                              |             |
|-----|----------------------|-------------------------------------------------------------------------------------|---------------------------------------------------------|----------------------------------|--------------------------------------------------------------------------------------------------------------|-------------|
| 315 | Rakicidin A          | 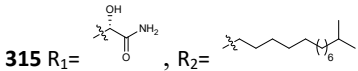   | <i>Micromonospora</i><br><i>a</i> strain R385-2.        | -                                | inactive                                                                                                     |             |
| 316 | Rakicidin B          |    |                                                         |                                  |                                                                                                              |             |
| 317 | Rakicidin C          |    |                                                         |                                  |                                                                                                              |             |
| 318 | Rakicidin D          |    |                                                         |                                  |                                                                                                              |             |
| 319 | Rakicidin E          |    |                                                         |                                  |                                                                                                              |             |
| 320 | Rakicidin F          |    |                                                         |                                  |                                                                                                              |             |
| 321 | Rakicidin G          |    |                                                         |                                  |                                                                                                              |             |
| 322 | Rakicidin H          |    |                                                         |                                  |                                                                                                              |             |
| 323 | Rakicidin I          |   |                                                         |                                  |                                                                                                              |             |
| 324 | Simplicillium-tide J |  | <i>Micromonospora chalcea</i><br>FIM 02-523             | -                                | <i>A. versicolor</i> (0.625<br>µg/disk), <i>C. australiensis</i><br>(0.156 µg/disk)                          | 124-<br>126 |
| 325 | Simplicillium-tide K |                                                                                     |                                                         |                                  | inactive                                                                                                     |             |
|     |                      |                                                                                     | <i>Streptomyces</i> sp. (strain<br>GT 61042)            | -                                | <i>B. subtilis</i> (50 µg/disk), <i>E. coli</i>                                                              |             |
|     |                      |                                                                                     | <i>Streptomyces</i> sp.<br>MWW064                       | Marine sediment<br>sample        | N/A                                                                                                          |             |
|     |                      |                                                                                     | <i>Micromonospora</i> sp. TP-<br>A0860                  | -                                |                                                                                                              | 119-<br>124 |
|     |                      |                                                                                     | <i>Streptomyces</i> sp.<br>GKU 220                      | marine sponge-<br>derived sample | <i>B. subtilis</i> , <i>E. coli</i><br>(25 µg/disk)                                                          |             |
|     |                      |                                                                                     | <i>Micromonospora</i><br><i>a chalcea</i> FIM<br>02-523 | -                                | <i>C. difficile</i> , <i>P. anaerobius</i> ,<br><i>P. gingivalis</i> , <i>P. acnes</i><br>(≅ 0.125-32 µg/ml) |             |

|     |                      |     |                                   |                                   |                                   |                                                                                                     |                           |                                                           |  |                                                                                       |
|-----|----------------------|-----|-----------------------------------|-----------------------------------|-----------------------------------|-----------------------------------------------------------------------------------------------------|---------------------------|-----------------------------------------------------------|--|---------------------------------------------------------------------------------------|
| 326 | Simplicillium-tide L |     |                                   |                                   |                                   |                                                                                                     |                           |                                                           |  |                                                                                       |
| 327 | Simplicillium-tide N | 324 | R <sub>1</sub><br>CH <sub>3</sub> | R <sub>2</sub><br>CH <sub>3</sub> | R <sub>3</sub><br>NH <sub>2</sub> | R <sub>4</sub><br> |                           |                                                           |  | A. solani (1.562-6.250 µg/disk), C. asianum (0.195-3.125 µg/disk)                     |
| 328 | Simplicillium-tide O | 325 | CH <sub>3</sub>                   | H                                 | NH <sub>2</sub>                   |                    |                           |                                                           |  |                                                                                       |
| 329 | Verlamelin A         | 326 | CH <sub>3</sub>                   | H                                 | NH <sub>2</sub>                   |                    |                           |                                                           |  | C. miyabeanus (no MIC values), A. solani (no MIC values), F. oxysporum (2-4 µg/disk), |
|     |                      | 327 | CH <sub>3</sub>                   | H                                 | OH                                |                    | Lecanicillium sp. HF627   | -                                                         |  | 127                                                                                   |
| 330 | Verlamelin B         | 328 | CH <sub>3</sub>                   | H                                 | OCH <sub>3</sub>                  |                    |                           |                                                           |  | C. cucumerinum (0.25-0.5 µg/disk), U. maydis (16->64 µg/disk)                         |
|     |                      | 329 | CH <sub>3</sub>                   | H                                 | NH <sub>2</sub>                   |                    |                           |                                                           |  |                                                                                       |
|     |                      | 330 | H                                 | H                                 | NH <sub>2</sub>                   |                    |                           |                                                           |  |                                                                                       |
| 331 | Stechlisin B2        |     |                                   |                                   |                                   |                                                                                                     |                           |                                                           |  | inactive                                                                              |
| 332 | Stechlisin F         |     |                                   |                                   |                                   |                                                                                                     | Pseudomonas sp. FhG100052 | Sample from lake (Brandenburg, Germany)                   |  | M. catarrhalis (4µg/ml)<br>-<br>128-129                                               |
| 333 | Tensin               |     |                                   |                                   |                                   |                                                                                                     |                           |                                                           |  | M. catarrhalis (32 µg/ml)                                                             |
|     |                      |     | 331 R=H                           | 332 R=                            | 333 R=                            |                  |                           |                                                           |  |                                                                                       |
| 334 | Bacillopeptin A      |     |                                   |                                   |                                   | 334 R=                                                                                              | Bacillus subtilis FR-2    | Sample from the the rhizosphere of garlic (Fukagawa city, |  | inactive<br>-<br>130                                                                  |

|     |                 |                                                                                                                                                                                                                                                                                                                                                                                                                                 |                                            |                                                                                                                       |                                                                                       |
|-----|-----------------|---------------------------------------------------------------------------------------------------------------------------------------------------------------------------------------------------------------------------------------------------------------------------------------------------------------------------------------------------------------------------------------------------------------------------------|--------------------------------------------|-----------------------------------------------------------------------------------------------------------------------|---------------------------------------------------------------------------------------|
| 335 | Bacillopeptin B | 335 R=                                                                                                                                                                                                                                                                                                                                         | Hokkaido, Japan)                           |                                                                                                                       |                                                                                       |
| 336 | Bacillopeptin C | 336 R=                                                                                                                                                                                                                                                                                                                                         |                                            | <i>F. oxysporum</i> , <i>A. niger</i> , <i>A. oryzae</i> , <i>P. thomii</i> , <i>S. cerevisiae</i><br>(6.25-25 µg/ml) |                                                                                       |
| 337 | Alveolaride A   |                                                                                                                                                                                                                                                                                                                                                | <i>Microascus alveolaris</i> strain PF1466 | Soil sample (Okinawa Prefecture, Japan)                                                                               | <i>P. oryzae</i> (2 µg/ml), <i>U. maydis</i> (0.4 µg/ml), <i>Z. tritici</i> (1 µg/ml) |
| 338 | Alveolaride B   | 337 R <sub>1</sub> =  , R <sub>2</sub> =                                                                                                                                                                                                                      |                                            |                                                                                                                       | inactive                                                                              |
| 339 | Alveolaride C   | 338 R <sub>1</sub> =  , R <sub>2</sub> = <br>339 R <sub>1</sub> =  , R <sub>2</sub> =  |                                            |                                                                                                                       |                                                                                       |

|     |                 |                                                                                                                                                                                                                                                                                                                                                                                                                            |                                           |                                                            |                                                                                     |                                |                                                  |                                                                    |
|-----|-----------------|----------------------------------------------------------------------------------------------------------------------------------------------------------------------------------------------------------------------------------------------------------------------------------------------------------------------------------------------------------------------------------------------------------------------------|-------------------------------------------|------------------------------------------------------------|-------------------------------------------------------------------------------------|--------------------------------|--------------------------------------------------|--------------------------------------------------------------------|
| 340 | Bacilotetrin A  | 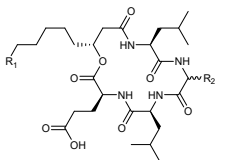                                                                                                                                                                                                                                                                                                                                          |                                           |                                                            | Marine sediment sample<br>(Gageocho reef, Republic<br>of Korea)                     | MRSA (8-32 µg/ml)              |                                                  |                                                                    |
| 341 | Bacilotetrin B  | 340 R <sub>1</sub> =  , R <sub>2</sub> =                                                                                                                                                                                                                 |                                           |                                                            |                                                                                     |                                |                                                  |                                                                    |
| 342 | Bacilotetrin C  | 341 R <sub>1</sub> =  +  ,<br>R <sub>2</sub> =                                                                                                                          | <i>Bacillus subtilis</i><br>109GGC020     |                                                            | marine sponge sample<br>(Gageo reef, Republic of<br>Korea)                          | <i>M. hyorhinis</i> (31 µg/ml) | 132-<br>133                                      |                                                                    |
| 343 | Bacilotetrin D  | 342 R <sub>1</sub> =  , R <sub>2</sub> =                                                                                                                                                                                                                 |                                           |                                                            |                                                                                     |                                |                                                  |                                                                    |
| 344 | Bacilotetrin E  | 343 R <sub>1</sub> =  , R <sub>2</sub> = <br>344 R <sub>1</sub> =  , R <sub>2</sub> =  |                                           |                                                            |                                                                                     |                                |                                                  |                                                                    |
| 345 | Sclerotiotide A |                                                                                                                                                                                                                                                                                                                                                                                                                            |                                           |                                                            |                                                                                     |                                |                                                  |                                                                    |
| 346 | Sclerotiotide B |                                                                                                                                                                                                                                                                                                                                         | <i>Aspergillus sclerotiorum</i><br>PT06-1 | Marine sample (Putian<br>Sea<br>Salt Field, Fujian, China) | <i>C. albicans</i> (3.8-30 µm)                                                      |                                |                                                  |                                                                    |
| 347 | Sclerotiotide F | R <sub>1</sub>                                                                                                                                                                                                                                                                                                                                                                                                             | R <sub>2</sub>                            | R <sub>3</sub>                                             |                                                                                     |                                | 134-<br>135                                      |                                                                    |
| 348 | Sclerotiotide M | 345                                                                                                                                                                                                                                                                                                                                                                                                                        | H                                         | H                                                          |  | <i>Aspergillus insulicola</i>  | a sample isolated from<br>an unidentified sponge | <i>B. cereus</i> , <i>P. species</i> , <i>E. tarda</i> , <i>V.</i> |
| 349 | Sclerotiotide N | 346                                                                                                                                                                                                                                                                                                                                                                                                                        | H                                         | Me                                                         | Me                                                                                  | HDN151418                      | (Antarctic)                                      | <i>parahemolyticus</i> , <i>B.</i>                                 |
|     |                 | 347                                                                                                                                                                                                                                                                                                                                                                                                                        | H                                         | Me                                                         | CHO                                                                                 |                                |                                                  |                                                                    |

|     |                 |     |    |    |                                                                                           |
|-----|-----------------|-----|----|----|-------------------------------------------------------------------------------------------|
|     |                 |     |    |    | <i>subtilis</i>                                                                           |
| 350 | Sclerotiotide O | 348 | H  | Me |                                                                                           |
|     |                 | 349 | H  | Me |                                                                                           |
|     |                 | 350 | Me | Me |                                                                                           |
| 351 | Goadvionin A1   |     |    |    |                                                                                           |
| 352 | Goadvionin A2   |     |    |    |                                                                                           |
| 353 | Goadvionin A3   |     |    |    |                                                                                           |
| 354 | Goadvionin A4   |     |    |    |                                                                                           |
|     |                 |     |    |    | inactive                                                                                  |
|     |                 |     |    |    | <i>Streptomyces</i>                                                                       |
|     |                 |     |    |    | sp. TP-A0584                                                                              |
|     |                 |     |    |    | -                                                                                         |
|     |                 |     |    |    | -                                                                                         |
|     |                 |     |    |    | 136                                                                                       |
|     |                 |     |    |    |                                                                                           |
| 355 | Goadvionin B1   | 351 |    | H  | X1                                                                                        |
| 356 | Goadvionin B2   | 352 |    | H  | X2                                                                                        |
|     |                 | 353 |    | H  | X3                                                                                        |
|     |                 |     |    |    | <i>S. aureus</i> (6.4 µg/ml), <i>B. subtilis</i> (3.2 µg/ml), <i>M. luteus</i> (3.2µg/ml) |

|     |               |                                                                                     |                                                                                   |                 |                |                                                                                                |
|-----|---------------|-------------------------------------------------------------------------------------|-----------------------------------------------------------------------------------|-----------------|----------------|------------------------------------------------------------------------------------------------|
| 357 | Goadvionin B3 | 354                                                                                 |  | H               | X <sub>4</sub> |                                                                                                |
|     |               | 355                                                                                 |  | CH <sub>3</sub> | X <sub>1</sub> | inactive                                                                                       |
| 358 | Goadvionin B4 | 356                                                                                 |  | CH <sub>3</sub> | X <sub>2</sub> |                                                                                                |
|     |               | 357                                                                                 |  | CH <sub>3</sub> | X <sub>3</sub> |                                                                                                |
| 359 | Goadpeptin A  | 358                                                                                 |  | CH <sub>3</sub> | X <sub>4</sub> | N/A                                                                                            |
| 360 | Goadpeptin B  | 359                                                                                 |  | H               | H              |                                                                                                |
|     |               | 360                                                                                 |  | CH <sub>3</sub> | H              |                                                                                                |
| 361 | Microvionin   |   |                                                                                   |                 |                | <i>Microbacterium arborescens</i> 5913 - MRSA (<0.46µg/ml), <i>S. pneumoniae</i> (<0.15 µg/ml) |
| 362 | Nocavionin    |  |                                                                                   |                 |                | <i>Nocardia terpenica</i> - N/A                                                                |

|     |               |                                                                                                                                                                                                             |                                      |                                                          |                                                                                                                                                           |                          |         |
|-----|---------------|-------------------------------------------------------------------------------------------------------------------------------------------------------------------------------------------------------------|--------------------------------------|----------------------------------------------------------|-----------------------------------------------------------------------------------------------------------------------------------------------------------|--------------------------|---------|
| 363 | Fusaricidin A | 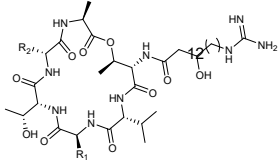                                                                                                                           |                                      |                                                          |                                                                                                                                                           |                          |         |
| 364 | Fusaricidin B |                                                                                                                                                                                                             | <i>Bacillus polymyxa</i> KT-8        | -                                                        | <i>S. aureus</i> , <i>M. luteus</i> , <i>B. subtilis</i> , <i>F. oxysporum</i> , <i>A. niger</i> , <i>A. oryzae</i> , <i>P. thomii</i> (<0.78-3.12 µg/ml) | σ (W)-regulated proteins | 138-139 |
| 365 | Fusaricidin C |                                                                                                                                                                                                             |                                      |                                                          |                                                                                                                                                           |                          |         |
| 366 | Fusaricidin D |                                                                                                                                                                                                             |                                      |                                                          |                                                                                                                                                           |                          |         |
|     |               | 363 R <sub>1</sub> =  , R <sub>2</sub> =  |                                      |                                                          |                                                                                                                                                           |                          |         |
|     |               | 364 R <sub>1</sub> =  , R <sub>2</sub> =  |                                      |                                                          |                                                                                                                                                           |                          |         |
|     |               | 365 R <sub>1</sub> =  , R <sub>2</sub> =  |                                      |                                                          |                                                                                                                                                           |                          |         |
|     |               | 366 R <sub>1</sub> =  , R <sub>2</sub> =  |                                      |                                                          |                                                                                                                                                           |                          |         |
| 367 | Gacamide A    |                                                                                                                           | <i>Pseudomonas fluorescens</i> Pf0-1 | Genome Mining and Repair of the Defective GacA Regulator | <i>A. crystallopoietes</i> (32 µg/ml)                                                                                                                     | -                        | 140     |
| 368 | Bacaucin      |                                                                                                                          | <i>Bacillus subtilis</i> CAU21       | -                                                        | MRSA (4µg/ml), VRE (16 µg/ml)                                                                                                                             | -                        | 141-142 |



|     |               |                                                                                                                                                                                                     |                                                |                                             |                                                                                                                            |                                                                                  |             |
|-----|---------------|-----------------------------------------------------------------------------------------------------------------------------------------------------------------------------------------------------|------------------------------------------------|---------------------------------------------|----------------------------------------------------------------------------------------------------------------------------|----------------------------------------------------------------------------------|-------------|
| 369 | Bacaucin-1    | 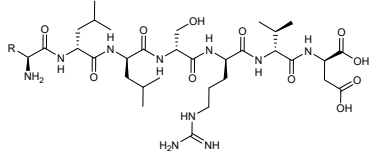                                                                                                                   | Semi-synthesis                                 | -                                           | <i>S. aureus</i> (4 µg/ml)                                                                                                 | cell membranes                                                                   |             |
| 370 | Bacaucin-1a   | <br>369 R=  370 R=CH <sub>3</sub> |                                                |                                             | MRSA (2 µg/ml)                                                                                                             | GMP synthase<br>RNA polymerase                                                   |             |
| 371 | Brevicidine   |                                                                                                                   | <i>Brevibacillus laterosporus</i><br>DSM 25    |                                             |                                                                                                                            |                                                                                  |             |
| 372 | Laterocidine  | <br>371 R=OH 372 R=H                                                                                              | <i>Brevibacillus laterosporus</i><br>ATCC9141  | -                                           | <i>E. coli</i> , <i>P. aeruginosa</i> , <i>A. baumannii</i> , <i>K. pneumoniae</i> , and <i>E. cloacae</i><br>(1-16 µg/ml) | LPS<br>cell membrane,<br>proton motive<br>force of Gram-<br>Negative<br>Bacteria | 143-<br>144 |
| 373 | Brevicidine B |                                                                                                                   | <i>Brevibacillus laterosporus</i><br>DSM 25    |                                             |                                                                                                                            |                                                                                  |             |
| 374 | SyCPA 2       |                                                                                                                  | synthetic-<br>bioinformatic<br>natural product | found in the<br>genomes of<br>eight species | Gram-positive bacteria,<br><i>A. baumannii</i> , <i>E. cloacae</i><br>(4-64 µg/ml)                                         | -                                                                                | 145         |
|     |               |                                                                                                                 |                                                |                                             |                                                                                                                            |                                                                                  |             |

---

375 SyCPA 4

The meso-diaminopimelic acid moiety

---

376 SyCPA 116

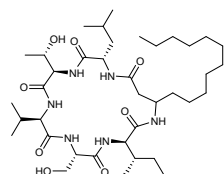

protein  
hydrolase ClpP

---

376

377 SyCPA 153

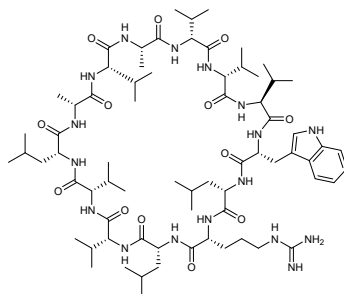

synthetic-  
bioinformatic  
natural product

found in the genomes of  
eight species

-

377

---

|     |           |                                                                                    |                                                                                            |
|-----|-----------|------------------------------------------------------------------------------------|--------------------------------------------------------------------------------------------|
| 378 | SyCPA 12  | 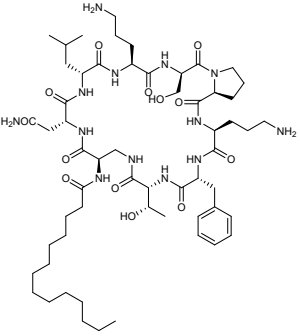  | cell membranes<br>as cationic<br>peptides                                                  |
|     |           | <b>378</b>                                                                         |                                                                                            |
| 379 | SyCPA 63  |   | Gram-positive bacteria,<br>Gram-negative bacteria<br>(2-64 µg/ml)<br>cell membrane         |
|     |           | <b>379</b>                                                                         |                                                                                            |
| 380 | SyCPA 102 |  | synthetic-<br>bioinformatic<br>natural product<br>found in the genomes of<br>eight species |
| 381 | SyCPA 123 | <b>380</b>                                                                         | cell membranes<br>as cationic<br>peptides                                                  |
|     |           | <b>381</b>                                                                         |                                                                                            |

382 SyCPA 144

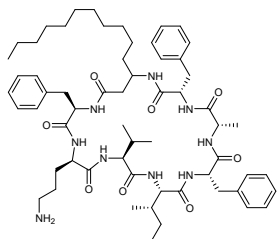

382

-

5. Other small-molecular antimicrobial peptides

383 Corbomycin

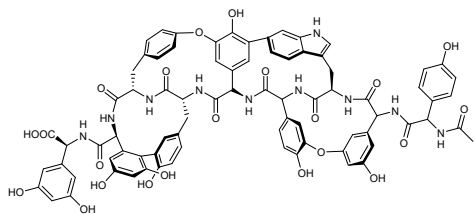

*Streptomyces*  
sp. WAC01529

Alberta, Canada

Gram-positive bacteria  
(0.5-4 µg/ml)

peptidoglycan  
metabolism

146

384 Mannopecti-  
mycin α

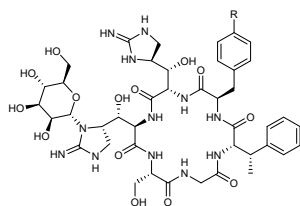

*Streptomyces*  
*hygroscopicus*  
LL-AC98

-

inactive

lipid II

147

385 Mannopecti-  
mycin β

*S. aureus*, *S. hemolyticus*,  
*B. subtilis*, *M. luteus*  
(1-64 µg/ml)

|     |                                 |                                                                                                                                                                                                          |                                                           |                                         |                                                                                                                                                                                       |                                                 |     |
|-----|---------------------------------|----------------------------------------------------------------------------------------------------------------------------------------------------------------------------------------------------------|-----------------------------------------------------------|-----------------------------------------|---------------------------------------------------------------------------------------------------------------------------------------------------------------------------------------|-------------------------------------------------|-----|
| 386 | Mannopepti-<br>mycin $\gamma$   | 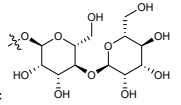<br><b>384 R=</b><br><b>385 R=OH</b>                                                                                    |                                                           |                                         |                                                                                                                                                                                       |                                                 |     |
| 387 | Mannopepti-<br>mycin $\delta$   | <br><b>386 R=</b><br><br><b>387 R=</b> |                                                           |                                         |                                                                                                                                                                                       |                                                 |     |
| 388 | Mannopepti-<br>mycin $\epsilon$ | <br><b>388 R=</b>                                                                                                       |                                                           |                                         |                                                                                                                                                                                       |                                                 |     |
| 389 | Pekiskomycin                    |                                                                                                                         | <i>Actinomycetes</i> ,<br>coded<br>WAC1420 and<br>WAC4229 | -                                       | VRE (no MIC value)                                                                                                                                                                    | -                                               | 148 |
| 390 | Amythiamicin A                  |                                                                                                                       | <i>Amycolatopsis</i><br>sp. MI481-42F4                    | Soil sample (Nerimaku,<br>Tokyo, Japan) | <i>S. aureus</i> , MRSA, <i>M.</i><br><i>luteus</i> , <i>B. anthracis</i> , <i>B.</i><br><i>subtilis</i> , <i>B. cereus</i> , <i>C.</i><br><i>bovis</i><br>(0.32-5.12 $\mu\text{m}$ ) | bacterial<br>elongation<br>factor Tu<br>(EF-Tu) | 149 |
| 391 | Amythiamicin B                  |                                                                                                                       |                                                           |                                         |                                                                                                                                                                                       |                                                 |     |

|     |                  |                                                                                                                                                                                                                 |                                   |     |                                                                                                 |
|-----|------------------|-----------------------------------------------------------------------------------------------------------------------------------------------------------------------------------------------------------------|-----------------------------------|-----|-------------------------------------------------------------------------------------------------|
|     |                  | 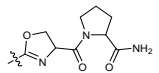                                                                                                                               |                                   |     |                                                                                                 |
| 392 | Amythiamicin C   |                                                                                                                                |                                   |     |                                                                                                 |
| 393 | Amythiamicin D   |                                                                                                                                |                                   |     |                                                                                                 |
|     |                  |                                                                                                                                |                                   |     |                                                                                                 |
| 394 | Saalfelduracin A |                                                                                                                                                                                                                 |                                   |     | <i>S. aureus</i> (0.25 µg/ml), <i>E. faecium</i> (0.12 µg/ml), <i>B. anthracis</i> (0.25 µg/ml) |
| 395 | Saalfelduracin B |                                                                                                                               | <i>mycolatopsis saalfeldensis</i> | -   | 150-151                                                                                         |
| 396 | Saalfelduracin C |                                                                                                                                                                                                                 | NRRL B-24474                      |     |                                                                                                 |
|     |                  |                                                                                                                                                                                                                 |                                   | N/A |                                                                                                 |
| 397 | Saalfelduracin D |  , R <sub>2</sub> =S                      |                                   |     |                                                                                                 |
|     |                  |  , R <sub>2</sub> =S  , R <sub>2</sub> =O |                                   |     |                                                                                                 |

|     |                  |                                                                                    |                                                    |                                   |                                                                                                                                                                               |   |     |                |                |                |
|-----|------------------|------------------------------------------------------------------------------------|----------------------------------------------------|-----------------------------------|-------------------------------------------------------------------------------------------------------------------------------------------------------------------------------|---|-----|----------------|----------------|----------------|
| 398 | Lactocillin      | 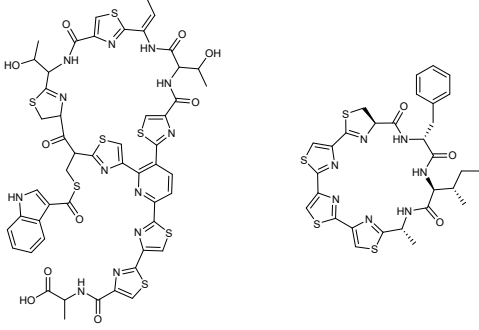  | <i>Lactobacillus gasseri</i> JV-V03                | human urinary system              | <i>S. aureus</i> , <i>E. faecalis</i> , <i>C. aurimucosum</i> , <i>G. vaginalis</i> , <i>S. sanguinis</i> , <i>S. sobrinus</i> and <i>S. mutans</i><br>(42-425 nM)            | - | 152 |                |                |                |
| 399 | Marthiapeptide A |   | <i>Marinactinospira thermotolerans</i> SCSIO 00652 | Marine sediment (South China Sea) | <i>M. luteus</i> , <i>S. aureus</i> , <i>B. subtilis</i> , <i>B. thuringiensis</i><br>(2.0-8.0 µg/ml)                                                                         | - | 153 |                |                |                |
| 400 | Nocathiacin I    |  | <i>Nocardia</i> sp. WW-12651                       | Soil sample (New Mexico, USA)     | <i>S. pneumoniae</i> , <i>E. faecalis</i> , <i>E. faecium</i> , <i>S. aureus</i> , <i>S. epidermidis</i> , <i>S. haemolyticus</i> , <i>M. catarrhalis</i><br>(0.01-0.25µg/ml) | - | 154 |                |                |                |
| 401 | Nocathiacin II   |                                                                                    |                                                    |                                   |                                                                                                                                                                               |   |     |                |                |                |
| 402 | Nocathiacin III  |                                                                                    |                                                    |                                   |                                                                                                                                                                               |   |     | R <sub>1</sub> | R <sub>2</sub> | R <sub>3</sub> |
| 403 | Nocathiacin IV   |                                                                                    |                                                    |                                   |                                                                                                                                                                               |   |     | H              |                |                |

|     |             |     |    |                                                                                   |                                                                                   |                                 |   |                                           |     |
|-----|-------------|-----|----|-----------------------------------------------------------------------------------|-----------------------------------------------------------------------------------|---------------------------------|---|-------------------------------------------|-----|
| 404 | Thiazomycin | 402 | OH | OH                                                                                |  | <i>Amycolatopsis fastidiosa</i> | - | Gram-positive bacteria<br>(no MIC values) | 155 |
|     |             | 403 | OH |  | H                                                                                 | MA7332                          |   |                                           |     |
|     |             | 404 | OH |  |  |                                 |   |                                           |     |

## Reference

1. G. Wu, B. T. M. Dentinger, J. R. Nielson, R. T. Peterson and J. M. Winter, *J Nat Prod*, 2021, **84**, 1113-1126.
2. L. Pantel, T. Florin, M. Dobosz-Bartoszek, E. Racine, M. Sarciaux, M. Serri, J. Houard, J. M. Campagne, R. M. de Figueiredo, C. Midrier, S. Gaudriault, A. Givaudan, A. Lanois, S. Forst, A. Aumelas, C. Cotteaux-Lautard, J. M. Bolla, C. Vingsbo Lundberg, D. L. Huseby, D. Hughes, P. Villain-Guillot, A. S. Mankin, Y. S. Polikanov and M. Gualtieri, *Mol Cell*, 2018, **70**, 83-94 e87.
3. E. Loza, M. Sarciaux, M. Ikaunieks, M. Katkevics, T. Kukosha, N. Trufilkina, V. Ryabova, K. Shubin, L. Pantel, M. Serri, D. L. Huseby, S. Cao, K. Yadav, K. Hjort, D. Hughes, M. Gualtieri, E. Suna and E. Racine, *Bioorg Med Chem*, 2020, **28**, 115469.
4. M. Sarciaux, L. Pantel, C. Midrier, M. Serri, C. Gerber, R. Marcia de Figueiredo, J.-M. Campagne, P. Villain-Guillot, M. Gualtieri and E. Racine, *Journal of Medicinal Chemistry*, 2018, **61**, 7814-7826.
5. C. L. Dieterich, S. I. Probst, R. Ueoka, I. Sandu, D. Schafle, M. D. Molin, H. A. Minas, R. Costa, A. Oxenius, P. Sander and J. Piel, *Angew Chem Int Ed Engl*, 2022, **61**, e202115802.
6. C. T. Lohans, M. J. van Belkum, S. A. Cochrane, Z. Huang, C. S. Sit, L. M. McMullen and J. C. Vederas, *Chembiochem*, 2014, **15**, 243-249.
7. S. A. Cochrane, B. Findlay, A. Bakhtiary, J. Z. Acedo, E. M. Rodriguez-Lopez, P. Mercier and J. C. Vederas, *Proc Natl Acad Sci U S A*, 2016, **113**, 11561-11566.
8. S. A. Cochrane, C. T. Lohans, M. J. van Belkum, M. A. Bels and J. C. Vederas, *Org Biomol Chem*, 2015, **13**, 6073-6081.
9. S. A. Cochrane, B. Findlay, J. C. Vederas and E. S. Ratemi, *Chembiochem*, 2014, **15**, 1295-1299.
10. X. Vila-Farres, J. Chu, D. Inoyama, M. A. Ternei, C. Lemetre, L. J. Cohen, W. Cho, B. V. Reddy, H. A. Zebroski, J. S. Freundlich, D. S. Perlin and S. F. Brady, *J Am Chem Soc*, 2017, **139**, 1404-1407.
11. J. Chu, X. Vila-Farres, D. Inoyama, M. Ternei, L. J. Cohen, E. A. Gordon, B. V. Reddy, Z. Charlop-Powers, H. A. Zebroski, R. Gallardo-Macias, M. Jaskowski, S. Satish, S. Park, D. S. Perlin, J. S. Freundlich and S. F. Brady, *Nat Chem Biol*, 2016, **12**, 1004-1006.
12. L. A. McDonald, L. R. Barbieri, G. T. Carter, E. Lenoy, J. Lotvin, P. J. Petersen, M. M. Siegel, G. Singh and R. T. Williamson, *J Am Chem Soc*, 2002, **124**, 10260-10261.
13. S. Chatterjee, S. R. Nadkarni, E. K. Vijayakumar, M. V. Patel, B. N. Ganguli, H. W. Fehlhaber and L. Vertesy, *J Antibiot (Tokyo)*, 1994, **47**, 595-598.



14. Y. Xie, R. Chen, S. Si, C. Sun and H. Xu, *J Antibiot (Tokyo)*, 2007, **60**, 158-161.
15. Y. Xie, H. Xu, S. Si, C. Sun and R. Chen, *J Antibiot (Tokyo)*, 2008, **61**, 237-240.
16. Y.-y. Xie, H.-z. Xu, Y. Yu and R.-x. Chen, *Zhongguo Kangshengsu Zazhi*, 2009, **34**, 12.
17. Y. Y. Xie, H. Z. Xu, Y. Yu and R. X. J. C. J. o. A. Chen, 2009, **34**, 326-328.
18. Y. Xie, H. Xu, C. Sun, Y. Yu and R. Chen, *J Antibiot (Tokyo)*, 2010, **63**, 143-146.
19. Y. Xie, Q. Cai, H. Ren, L. Wang, H. Xu, B. Hong, L. Wu and R. Chen, *J Nat Prod*, 2014, **77**, 1744-1748.
20. A. T. Tran, E. E. Watson, V. Pujari, T. Conroy, L. J. Dowman, A. M. Giltrap, A. Pang, W. R. Wong, R. G. Linington, S. Mahapatra, J. Saunders, S. A. Charman, N. P. West, T. D. Bugg, J. Tod, C. G. Dowson, D. I. Roper, D. C. Crick, W. J. Britton and R. J. Payne, *Nat Commun*, 2017, **8**, 14414.
21. C. M. Kayrouz, Y. Zhang, T. M. Pham and K. S. Ju, *ACS Chem Biol*, 2020, **15**, 1921-1929.
22. K. S. Ju, J. Gao, J. R. Doroghazi, K. K. Wang, C. J. Thibodeaux, S. Li, E. Metzger, J. Fudala, J. Su, J. K. Zhang, J. Lee, J. P. Cioni, B. S. Evans, R. Hirota, D. P. Labeda, W. A. van der Donk and W. W. Metcalf, *Proc Natl Acad Sci U S A*, 2015, **112**, 12175-12180.
23. M. Metelev, I. A. Osterman, D. Ghilarov, N. F. Khabibullina, A. Yakimov, K. Shabalin, I. Utkina, D. Y. Travin, E. S. Komarova, M. Serebryakova, T. Artamonova, M. Khodorkovskii, A. L. Konevega, P. V. Sergiev, K. Severinov and Y. S. Polikanov, *Nat Chem Biol*, 2017, **13**, 1129-1136.
24. J. Ma, H. Huang, Y. Xie, Z. Liu, J. Zhao, C. Zhang, Y. Jia, Y. Zhang, H. Zhang, T. Zhang and J. Ju, *Nat Commun*, 2017, **8**, 391.
25. C. Sun, Z. Liu, X. Zhu, Z. Fan, X. Huang, Q. Wu, X. Zheng, X. Qin, T. Zhang, H. Zhang, J. Ju and J. Ma, *J Nat Prod*, 2020, **83**, 1646-1657.
26. B. Zhou, G. Shetye, Y. Yu, B. D. Santarsiero, L. L. Klein, C. Abad-Zapatero, N. M. Wolf, J. Cheng, Y. Jin, H. Lee, J. W. Suh, H. Lee, J. Bisson, J. B. McAlpine, S. N. Chen, S. H. Cho, S. G. Franzblau and G. F. Pauli, *J Nat Prod*, 2020, **83**, 657-667.
27. B. Zhou, P. S. Achanta, G. Shetye, S. N. Chen, H. Lee, Y. Y. Jin, J. Cheng, M. J. Lee, J. W. Suh, S. Cho, S. G. Franzblau, G. F. Pauli and J. B. McAlpine, *J Nat Prod*, 2021, **84**, 2644-2663.
28. L. Li, L. W. MacIntyre, T. Ali, R. Russo, B. Koirala, Y. Hernandez and S. F. Brady, *J Nat Prod*, 2021, **84**, 1056-1066.
29. E. Gavrish, C. S. Sit, S. Cao, O. Kandror, A. Spoering, A. Peoples, L. Ling, A. Fetterman, D. Hughes, A. Bissell, H. Torrey, T. Akopian, A. Mueller, S. Epstein, A. Goldberg, J. Clardy and K. Lewis, *Chem Biol*, 2014, **21**, 509-518.
30. X. M. Hou, T. M. Liang, Z. Y. Guo, C. Y. Wang and C. L. Shao, *Chem Commun (Camb)*, 2019, **55**, 1104-1107.
31. R. Chao, X. M. Hou, W. F. Xu, Y. Hai, M. Y. Wei, C. Y. Wang, Y. C. Gu and C. L. Shao, *J Nat Prod*, 2021, **84**, 11-19.
32. Y. Imai, K. J. Meyer, A. Iinishi, Q. Favre-Godal, R. Green, S. Manuse, M. Caboni, M. Mori, S. Niles, M. Ghiglieri, C. Honrao, X. Ma, J. J. Guo, A. Makriyannis, L. Linares-Otoya, N. Bohringer, Z. G. Wuisan, H. Kaur, R. Wu, A. Mateus, A. Typas, M. M. Savitski, J. L. Espinoza, A. O'Rourke, K. E. Nelson, S. Hiller, N. Noinaj, T. F. Schaberle, A. D'Onofrio and K. Lewis, *Nature*, 2019, **576**, 459-464.

33. N. Bohringer, R. Green, Y. Liu, U. Mettal, M. Marner, S. M. Modaresi, R. P. Jakob, Z. G. Wuisan, T. Maier, A. Iinishi, S. Hiller, K. Lewis and T. F. Schaberle, *Microbiol Spectr*, 2021, **9**, e0153521.
34. S. Gross, F. Panter, D. Pogorevc, C. E. Seyfert, S. Deckarm, C. D. Bader, J. Herrmann and R. Muller, *Chem Sci*, 2021, **12**, 11882-11893.
35. C. E. Seyfert, C. Porten, B. Yuan, S. Deckarm, F. Panter, C. D. Bader, J. Coetzee, F. Deschner, K. Tehrani, P. G. Higgins, H. Seifert, T. C. Marlovits, J. Herrmann and R. Muller, *Angew Chem Int Ed Engl*, 2023, **62**, e202214094.
36. R. D. Miller, A. Iinishi, S. M. Modaresi, B. K. Yoo, T. D. Curtis, P. J. Lariviere, L. Liang, S. Son, S. Nicolau, R. Bargabos, M. Morrissette, M. F. Gates, N. Pitt, R. P. Jakob, P. Rath, T. Maier, A. G. Malyutin, J. T. Kaiser, S. Niles, B. Karavas, M. Ghiglieri, S. E. J. Bowman, D. C. Rees, S. Hiller and K. Lewis, *Nat Microbiol*, 2022, **7**, 1661-1672.
37. A. Zipperer, M. C. Konnerth, C. Laux, A. Berscheid, D. Janek, C. Weidenmaier, M. Burian, N. A. Schilling, C. Slavetinsky, M. Marschal, M. Willmann, H. Kalbacher, B. Schitteck, H. Brotz-Oesterhelt, S. Grond, A. Peschel and B. Krismer, *Nature*, 2016, **535**, 511-516.
38. Y. H. Shin, S. Bae, J. Sim, J. Hur, S. I. Jo, J. Shin, Y. G. Suh, K. B. Oh and D. C. Oh, *J Nat Prod*, 2017, **80**, 2962-2968.
39. S. Son, Y. S. Hong, M. Jang, K. T. Heo, B. Lee, J. P. Jang, J. W. Kim, I. J. Ryoo, W. G. Kim, S. K. Ko, B. Y. Kim, J. H. Jang and J. S. Ahn, *J Nat Prod*, 2017, **80**, 3025-3031.
40. C. M. Mudalungu, W. J. von Törne, K. Voigt, C. Rückert, S. Schmitz, O. N. Sekurova, S. B. Zotchev and R. D. Süßmuth, *Journal of Natural Products*, 2019, **82**, 1478-1486.
41. I. Kaweewan, H. Komaki, H. Hemmi and S. Kodani, *Asian Journal of Organic Chemistry*, 2017, **6**, 1838-1844.
42. J. P. Jang, G. J. Hwang, M. C. Kwon, I. J. Ryoo, M. Jang, S. Takahashi, S. K. Ko, H. Osada, J. H. Jang and J. S. Ahn, *J Nat Prod*, 2018, **81**, 806-810.
43. D. Carretero-Molina, F. J. Ortiz-Lopez, J. Martin, I. Gonzalez, M. Sanchez-Hidalgo, F. Roman-Hurtado, C. Diaz, M. de la Cruz, O. Genilloud and F. Reyes, *J Nat Prod*, 2021, **84**, 1127-1134.
44. I. Kaweewan, H. Hemmi, H. Komaki and S. Kodani, *J Antibiot (Tokyo)*, 2020, **73**, 224-229.
45. S. Hwang, L. Le, S. I. Jo, J. Shin, M. J. Lee and D. C. Oh, *Microorganisms*, 2020, **8**.
46. M. Igarashi, R. Sawa, N. Kinoshita, H. Hashizume, N. Nakagawa, Y. Homma, Y. Nishimura and Y. Akamatsu, *J Antibiot (Tokyo)*, 2008, **61**, 387-393.
47. H. Hashizume, R. Sawa, K. Yamashita, Y. Nishimura and M. Igarashi, *J Antibiot (Tokyo)*, 2017, **70**, 699-704.
48. D. I. Ekanayake, B. Perlatti, D. C. Swenson, K. Poldmaa, G. F. Bills and J. B. Gloer, *J Nat Prod*, 2021, **84**, 2028-2034.
49. R. Teta, V. T. Marteinson, A. Longeon, A. M. Klonowski, R. Groben, M. L. Bourguet-Kondracki, V. Costantino and A. Mangoni, *J Nat Prod*, 2017, **80**, 2530-2535.
50. L. Zhao, R. M. Awori, M. Kaiser, J. Gross, T. Opatz and H. B. Bode, *J Nat Prod*, 2019, **82**, 3499-3503.
51. Y. M. Ma, X. A. Liang, H. C. Zhang and R. Liu, *J Agric Food Chem*, 2016, **64**, 3789-3793.
52. S. Miao, M. R. Anstee, K. LaMarco, J. Matthew, L. H. T. Huang and M. M. Bresseur, *Journal of Natural Products*, 1997, **60**, 858-861.
53. Y. Song, Q. Li, X. Liu, Y. Chen, Y. Zhang, A. Sun, W. Zhang, J. Zhang and J. Ju, *J Nat Prod*, 2014, **77**, 1937-1941.
54. Z. G. Khalil, A. A. Salim, E. Lacey, A. Blumenthal and R. J. Capon, *Org Lett*, 2014, **16**, 5120-5123.

55. K. Takada, A. Ninomiya, M. Naruse, Y. Sun, M. Miyazaki, Y. Nogi, S. Okada and S. Matsunaga, *J Org Chem*, 2013, **78**, 6746-6750.
56. F. Xu, B. Nazari, K. Moon, L. B. Bushin and M. R. Seyedsayamdost, *J Am Chem Soc*, 2017, **139**, 9203-9212.
57. A. Ibrahim, J. B. Tanney, F. Fei, K. A. Seifert, G. C. Cutler, A. Capretta, J. D. Miller and M. W. Sumarah, *Sci Rep*, 2020, **10**, 4599.
58. J. Zheng, H. Zhu, K. Hong, Y. Wang, P. Liu, X. Wang, X. Peng and W. Zhu, *Org Lett*, 2009, **11**, 5262-5265.
59. Q. Liu, Z. Liu, C. Sun, M. Shao, J. Ma, X. Wei, T. Zhang, W. Li and J. Ju, *Org Lett*, 2019, **21**, 2634-2638.
60. C. Sun, Z. Yang, C. Zhang, Z. Liu, J. He, Q. Liu, T. Zhang, J. Ju and J. Ma, *Org Lett*, 2019, **21**, 1453-1457.
61. Z. Yang, C. Sun, Z. Liu, Q. Liu, T. Zhang, J. Ju and J. Ma, *J Nat Prod*, 2020, **83**, 1666-1673.
62. S. Um, S. H. Park, J. Kim, H. J. Park, K. Ko, H. S. Bang, S. K. Lee, J. Shin and D. C. Oh, *Org Lett*, 2015, **17**, 1272-1275.
63. Y. H. Shin, Y. H. Ban, T. H. Kim, E. S. Bae, J. Shin, S. K. Lee, J. Jang, Y. J. Yoon and D. C. Oh, *J Nat Prod*, 2021, **84**, 239-246.
64. S. Toki, T. Agatsuma, K. Ochiai, Y. Saitoh, K. Ando, S. Nakanishi, N. A. Lokker, N. A. Giese and Y. Matsuda, *The Journal of Antibiotics*, 2001, **54**, 405-414.
65. J. Bracegirdle, P. Hou, V. V. Nowak, D. F. Ackerley, R. A. Keyzers and J. G. Owen, *J Nat Prod*, 2021, **84**, 2536-2543.
66. G. Navarro, A. T. Cheng, K. C. Peach, W. M. Bray, V. S. Bernan, F. H. Yildiz and R. G. Linington, *Antimicrob Agents Chemother*, 2014, **58**, 1092-1099.
67. S. Pohle, C. Appelt, M. Roux, H. P. Fiedler and R. D. Sussmuth, *J Am Chem Soc*, 2011, **133**, 6194-6205.
68. M. R. U. Karim, Y. In, T. Zhou, E. Harunari, N. Oku and Y. Igarashi, *Org Lett*, 2021, **23**, 2109-2113.
69. J. S. An, M. S. Kim, J. Han, S. C. Jang, J. H. Im, J. Cui, Y. Lee, S. J. Nam, J. Shin, S. K. Lee, Y. J. Yoon and D. C. Oh, *J Nat Prod*, 2022, **85**, 804-814.
70. C. Zhang and M. R. Seyedsayamdost, *Angew Chem Int Ed Engl*, 2020, **59**, 23005-23009.
71. D. Dardic, G. Lauro, G. Bifulco, P. Laboudie, P. Sakhaei, A. Bauer, A. Vilcinskas, P. E. Hammann and A. Plaza, *J Org Chem*, 2017, **82**, 6032-6043.
72. C. Menegatti, V. B. Lourenzon, D. Rodriguez-Hernandez, W. G. da Paixao Melo, L. L. G. Ferreira, A. D. Andricopulo, F. S. do Nascimento and M. T. Pupo, *J Nat Prod*, 2020, **83**, 610-616.
73. D.-C. Oh, M. Poulsen, C. R. Currie and J. Clardy, *Nature Chemical Biology*, 2009, **5**, 391-393.
74. T. P. Wyche, A. C. Ruzzini, C. Beemelmans, K. H. Kim, J. L. Klassen, S. Cao, M. Poulsen, T. S. Bugni, C. R. Currie and J. Clardy, *Org Lett*, 2017, **19**, 1772-1775.
75. D. Shin, W. S. Byun, K. Moon, Y. Kwon, M. Bae, S. Um, S. K. Lee and D. C. Oh, *Front Chem*, 2018, **6**, 498.
76. M. Bae, E. Mevers, G. Pishchany, S. G. Whaley, C. O. Rock, D. R. Andes, C. R. Currie, M. T. Pupo and J. Clardy, *Org Lett*, 2021, **23**, 1648-1652.
77. X. Zhou, H. Huang, J. Li, Y. Song, R. Jiang, J. Liu, S. Zhang, Y. Hua and J. Ju, *Tetrahedron*, 2014, **70**, 7795-7801.
78. U. Grafe, R. Schlegel, M. Ritzau, W. Ihn, K. Dornberger, C. Stengel, W. F. Fleck, W. Gutsche, A. Hartl and E. F. Paulus, *J Antibiot (Tokyo)*, 1995, **48**, 119-125.
79. A. G. Therien, J. L. Huber, K. E. Wilson, P. Beaulieu, A. Caron, D. Claveau, K. Deschamps, R. G. Donald, A. M. Galgoci, M. Gallant, X. Gu, N. J. Kevin, J. Lafleur, P. S. Leavitt, C. Lebeau-Jacob, S. S. Lee, M. M. Lin, A. A. Michels, A. M. Ogawa, R. E. Painter, C. A. Parish, Y. W. Park, L. Benton-Perdomo, M. Petcu, J. W. Phillips, M. A. Powles, K. I. Skorey, J. Tam, C. M. Tan, K. Young,

- S. Wong, S. T. Waddell and L. Miesel, *Antimicrob Agents Chemother*, 2012, **56**, 4662-4670.
80. M. Perez-Bonilla, D. Oves-Costales, I. Gonzalez, M. de la Cruz, J. Martin, F. Vicente, O. Genilloud and F. Reyes, *J Nat Prod*, 2020, **83**, 2597-2606.
81. S. Um, T. J. Choi, H. Kim, B. Y. Kim, S. H. Kim, S. K. Lee, K. B. Oh, J. Shin and D. C. Oh, *J Org Chem*, 2013, **78**, 12321-12329.
82. W. Gao, J. Y. Kim, S. N. Chen, S. H. Cho, J. Choi, B. U. Jaki, Y. Y. Jin, D. C. Lankin, J. E. Lee, S. Y. Lee, J. B. McAlpine, J. G. Napolitano, S. G. Franzblau, J. W. Suh and G. F. Pauli, *Org Lett*, 2014, **16**, 6044-6047.
83. L. L. Ling, T. Schneider, A. J. Peoples, A. L. Spoering, I. Engels, B. P. Conlon, A. Mueller, T. F. Schaberle, D. E. Hughes, S. Epstein, M. Jones, L. Lazarides, V. A. Steadman, D. R. Cohen, C. R. Felix, K. A. Fetterman, W. P. Millett, A. G. Nitti, A. M. Zullo, C. Chen and K. Lewis, *Nature*, 2015, **517**, 455-459.
84. D. A. Wirtz, K. C. Ludwig, M. Arts, C. E. Marx, S. Krannich, P. Barac, S. Kehraus, M. Josten, B. Henrichfreise, A. Muller, G. M. Konig, A. J. Peoples, A. Nitti, A. L. Spoering, L. L. Ling, K. Lewis, M. Crusemann and T. Schneider, *Angew Chem Int Ed Engl*, 2021, **60**, 13579-13586.
85. K. Kaida, R. Fudou, T. Kameyama, K. Tubaki, Y. Suzuki, M. Ojika and Y. Sakagami, *J Antibiot (Tokyo)*, 2001, **54**, 17-21.
86. T. W. Soe, C. Han, R. Fudou, K. Kaida, Y. Sawaki, T. Tomura and M. Ojika, *J Nat Prod*, 2019, **82**, 1971-1978.
87. S. Son, S. K. Ko, M. Jang, J. K. Lee, I. J. Ryoo, J. S. Lee, K. H. Lee, N. K. Soung, H. Oh, Y. S. Hong, B. Y. Kim, J. H. Jang and J. S. Ahn, *Org Lett*, 2015, **17**, 4046-4049.
88. S. Son, M. Jang, B. Lee, J. P. Jang, Y. S. Hong, B. Y. Kim, S. K. Ko, J. H. Jang and J. S. Ahn, *J Antibiot (Tokyo)*, 2021, **74**, 181-189.
89. S. Wei, W. Zhang and Z. Ji, *Molecules*, 2015, **20**, 16278-16289.
90. Y. Imai, G. Hauk, J. Quigley, L. Liang, S. Son, M. Ghiglieri, M. F. Gates, M. Morrisette, N. Shahsavari, S. Niles, D. Baldisseri, C. Honrao, X. Ma, J. J. Guo, J. M. Berger and K. Lewis, *Nat Chem Biol*, 2022, **18**, 1236-1244.
91. F. Kong and G. T. Carter, *J Antibiot (Tokyo)*, 2003, **56**, 557-564.
92. L. Vertesy, E. Ehlers, H. Kogler, M. Kurz, J. Meiwes, G. Seibert, M. Vogel and P. Hammann, *J Antibiot (Tokyo)*, 2000, **53**, 816-827.
93. K. Yamanaka, K. A. Reynolds, R. D. Kersten, K. S. Ryan, D. J. Gonzalez, V. Nizet, P. C. Dorrestein and B. S. Moore, *Proc Natl Acad Sci U S A*, 2014, **111**, 1957-1962.
94. K. A. Reynolds, H. Luhavaya, J. Li, S. Dahesh, V. Nizet, K. Yamanaka and B. S. Moore, *J Antibiot (Tokyo)*, 2018, **71**, 333-338.
95. B. M. Hover, S. H. Kim, M. Katz, Z. Charlop-Powers, J. G. Owen, M. A. Ternei, J. Maniko, A. B. Estrela, H. Molina, S. Park, D. S. Perlin and S. F. Brady, *Nat Microbiol*, 2018, **3**, 415-422.
96. C. Wu, Z. Shang, C. Lemetre, M. A. Ternei and S. F. Brady, *J Am Chem Soc*, 2019, **141**, 3910-3919.
97. H. Hamamoto, M. Urai, K. Ishii, J. Yasukawa, A. Paudel, M. Murai, T. Kaji, T. Kuranaga, K. Hamase, T. Katsu, J. Su, T. Adachi, R. Uchida, H. Tomoda, M. Yamada, M. Souma, H. Kurihara, M. Inoue and K. Sekimizu, *Nat Chem Biol*, 2015, **11**, 127-133.
98. M. Santiago, W. Lee, A. A. Fayad, K. A. Coe, M. Rajagopal, T. Do, F. Hennessen, V. Srisuknimit, R. Muller, T. C. Meredith and S. Walker, *Nat Chem Biol*, 2018, **14**, 601-608.
99. A. Kato, S. Nakaya, N. Kokubo, Y. Aiba, Y. Ohashi, H. Hirata, K. Fujii and K.-I. Harada, *The Journal of Antibiotics*, 1998, **51**, 929-935.

100. M. Sang, H. Wang, Y. Shen, N. Rodrigues de Almeida, M. Conda-Sheridan, S. Li, Y. Li and L. Du, *Org Lett*, 2019, **21**, 6432-6436.
101. L. Li, B. Koirala, Y. Hernandez, L. W. MacIntyre, M. A. Ternei, R. Russo and S. F. Brady, *Nat Microbiol*, 2022, **7**, 120-131.
102. K. A. Tawfik, P. Jeffs, B. Bray, G. Dubay, J. O. Falkinham, M. Mesbah, D. Youssef, S. Khalifa and E. W. Schmidt, *Org Lett*, 2010, **12**, 664-666.
103. Z. Lin, J. O. Falkinham, 3rd, K. A. Tawfik, P. Jeffs, B. Bray, G. Dubay, J. E. Cox and E. W. Schmidt, *J Nat Prod*, 2012, **75**, 1518-1523.
104. S. E. Lu, J. Novak, F. W. Austin, G. Gu, D. Ellis, M. Kirk, S. Wilson-Stanford, M. Tonelli and L. Smith, *Biochemistry*, 2009, **48**, 8312-8321.
105. G. Gu, L. Smith, A. Liu and S. E. Lu, *Appl Environ Microbiol*, 2011, **77**, 6189-6198.
106. A. P. Tyurin, V. A. Alferova, A. S. Paramonov, M. V. Shuvalov, G. K. Kudryakova, E. A. Rogozhin, A. Y. Zherebker, V. A. Brylev, A. A. Chistov, A. A. Baranova, M. V. Biryukov, I. A. Ivanov, I. A. Prokhorenko, N. E. Grammatikova, T. V. Kravchenko, E. B. Isakova, E. P. Mirchink, E. G. Gladkikh, E. V. Svirshchevskaya, A. V. Mardanov, A. V. Beletsky, M. V. Kocharovskaya, V. V. Kulyaeva, A. S. Shashkov, D. E. Tsvetkov, N. E. Nifantiev, A. S. Apt, K. B. Majorov, S. S. Efimova, N. V. Ravin, E. N. Nikolaev, O. S. Ostroumova, G. S. Katrukha, O. A. Lapchinskaya, O. A. Dontsova, S. S. Terekhov, I. A. Osterman, Z. O. Shenkarev and V. A. Korshun, *Angew Chem Int Ed Engl*, 2021, **60**, 18694-18703.
107. T. Neuhof, P. Schmieder, K. Preussel, R. Dieckmann, H. Pham, F. Bartl and H. von Dohren, *J Nat Prod*, 2005, **68**, 695-700.
108. T. Neuhof, P. Schmieder, M. Seibold, K. Preussel and H. von Dohren, *Bioorg Med Chem Lett*, 2006, **16**, 4220-4222.
109. J. Vestola, T. K. Shishido, J. Jokela, D. P. Fewer, O. Aitio, P. Permi, M. Wahlsten, H. Wang, L. Rouhiainen and K. Sivonen, *Proc Natl Acad Sci U S A*, 2014, **111**, E1909-1917.
110. C. Pancrace, J. Jokela, N. Sassoon, C. Ganneau, M. Desnos-Ollivier, M. Wahlsten, A. Humisto, A. Calteau, S. Bay, D. P. Fewer, K. Sivonen and M. Gugger, *ACS Chem Biol*, 2017, **12**, 1796-1804.
111. Y. Lim, J. W. Suh, S. Kim, B. Hyun, C. Kim and C. H. Lee, *J Antibiot (Tokyo)*, 1994, **47**, 1406-1416.
112. Z. Wang, B. Koirala, Y. Hernandez, M. Zimmerman, S. Park, D. S. Perlin and S. F. Brady, *Nature*, 2022, **601**, 606-611.
113. Z. Wang, B. Koirala, Y. Hernandez, M. Zimmerman and S. F. Brady, *Science*, 2022, **376**, 991-996.
114. S. Son, S. K. Ko, M. Jang, J. W. Kim, G. S. Kim, J. K. Lee, E. S. Jeon, Y. Futamura, I. J. Ryoo, J. S. Lee, H. Oh, Y. S. Hong, B. Y. Kim, S. Takahashi, H. Osada, J. H. Jang and J. S. Ahn, *Mar Drugs*, 2016, **14**.
115. A. Holtzel, D. G. Schmid, G. J. Nicholson, S. Stevanovic, J. Schimana, K. Gebhardt, H. P. Fiedler and G. Jung, *J Antibiot (Tokyo)*, 2002, **55**, 571-577.
116. P. Kulanthaivel, A. J. Kreuzman, M. A. Strege, M. D. Belvo, T. A. Smitka, M. Clemens, J. R. Swartling, K. L. Minton, F. Zheng, E. L. Angleton, D. Mullen, L. N. Jungheim, V. J. Klimkowski, T. I. Nicas, R. C. Thompson and S. B. Peng, *J Biol Chem*, 2004, **279**, 36250-36258.
117. P. A. Smith, M. F. T. Koehler, H. S. Girgis, D. Yan, Y. Chen, Y. Chen, J. J. Crawford, M. R. Durk, R. I. Higuchi, J. Kang, J. Murray, P. Paraselli, S. Park, W. Phung, J. G. Quinn, T. C. Roberts, L. Rouge, J. B. Schwarz, E. Skippington, J. Wai, M. Xu, Z. Yu, H. Zhang, M. W. Tan and C. E. Heise, *Nature*, 2018, **561**, 189-194.
118. M. Igarashi, T. Shida, Y. Sasaki, N. Kinoshita, H. Naganawa, M. Hamada and T. Takeuchi, *J Antibiot (Tokyo)*, 1999, **52**, 873-879.

119. K. D. McBrien, R. L. Berry, S. E. Lowe, K. M. Neddermann, I. Bursucker, S. Huang, S. E. Klohr and J. E. Leet, *J Antibiot (Tokyo)*, 1995, **48**, 1446-1452.
120. J.-F. Hu, D. Wunderlich, I. Sattler, X.-Z. Feng, S. Grabley and R. Thiericke, *European Journal of Organic Chemistry*, 2000, **2000**, 3353-3356.
121. S. Kitani, T. Ueguchi, Y. Igarashi, K. Leetanasaksakul, A. Thamchaipenet and T. Nihira, *J Antibiot (Tokyo)*, 2017, DOI: 10.1038/ja.2017.92.
122. Y. Igarashi, R. Shimasaki, S. Miyanaga, N. Oku, H. Onaka, H. Sakurai, I. Saiki, S. Kitani, T. Nihira, W. Wimoniravude and W. Panbangred, *J Antibiot (Tokyo)*, 2010, **63**, 563-565.
123. N. Oku, S. Matoba, Y. M. Yamazaki, R. Shimasaki, S. Miyanaga and Y. Igarashi, *J Nat Prod*, 2014, **77**, 2561-2565.
124. L. Chen, W. Zhao, H.-L. Jiang, J. Zhou, X.-M. Chen, Y.-Y. Lian, H. Jiang and F. Lin, *Tetrahedron*, 2018, **74**, 4151-4154.
125. X. Liang, X. H. Nong, Z. H. Huang and S. H. Qi, *J Agric Food Chem*, 2017, **65**, 5114-5121.
126. F. Karim, X. Liang and S.-H. Qi, *Phytochemistry Letters*, 2022, **48**, 68-71.
127. K. Ishidoh, H. Kinoshita, Y. Igarashi, F. Ihara and T. Nihira, *J Antibiot (Tokyo)*, 2014, **67**, 459-463.
128. M. Marner, M. A. Patras, M. Kurz, F. Zubeil, F. Forster, S. Schuler, A. Bauer, P. Hammann, A. Vilcinskas, T. F. Schaberle and J. Glaeser, *J Nat Prod*, 2020, **83**, 2607-2617.
129. A. Henriksen, U. Anthoni, T. H. Nielsen, J. Sorensen, C. Christophersen and M. Gajhede, *Acta Crystallogr C*, 2000, **56 ( Pt 1)**, 113-115.
130. Y. Kajimura, M. Sugiyama and M. Kaneda, *J Antibiot (Tokyo)*, 1995, **48**, 1095-1103.
131. S. Fotso, P. Graupner, Q. Xiong, J. R. Gilbert, D. Hahn, C. Avila-Adame, G. Davis and K. Sumiyoshi, *J Nat Prod*, 2018, **81**, 10-15.
132. F. S. Tareq and H. J. Shin, *J Nat Prod*, 2017, **80**, 2889-2892.
133. H. S. Lee and H. J. Shin, *Mar Drugs*, 2021, **19**.
134. J. Zheng, Z. Xu, Y. Wang, K. Hong, P. Liu and W. Zhu, *J Nat Prod*, 2010, **73**, 1133-1137.
135. C. Sun, Z. Zhang, Z. Ren, L. Yu, H. Zhou, Y. Han, M. Shah, Q. Che, G. Zhang, D. Li and T. Zhu, *Mar Drugs*, 2020, **18**.
136. R. Kozakai, T. Ono, S. Hoshino, H. Takahashi, Y. Katsuyama, Y. Sugai, T. Ozaki, K. Teramoto, K. Teramoto, K. Tanaka, I. Abe, S. Asamizu and H. Onaka, *Nat Chem*, 2020, **12**, 869-877.
137. V. Wiebach, A. Mainz, M. J. Siegert, N. A. Jungmann, G. Lesquame, S. Tirat, A. Dreux-Zigha, J. Aszodi, D. Le Beller and R. D. Sussmuth, *Nat Chem Biol*, 2018, **14**, 652-654.
138. Y. Kajimura and M. Kaneda, *J Antibiot (Tokyo)*, 1996, **49**, 129-135.
139. Y. Kajimura and M. Kaneda, *The Journal of Antibiotics*, 1997, **50**, 220-228.
140. G. Jahanshah, Q. Yan, H. Gerhardt, Z. Pataj, M. Lammerhofer, I. Pianet, M. Josten, H. G. Sahl, M. W. Silby, J. E. Loper and H. Gross, *J Nat Prod*, 2019, **82**, 301-308.
141. Y. Liu, S. Ding, R. Dietrich, E. Martlbauer and K. Zhu, *Angew Chem Int Ed Engl*, 2017, **56**, 1486-1490.
142. Y. Liu, M. Song, S. Ding and K. Zhu, *ACS Infect Dis*, 2019, **5**, 123-130.
143. Y. X. Li, Z. Zhong, W. P. Zhang and P. Y. Qian, *Nat Commun*, 2018, **9**, 3273.
144. X. H. Zhao and O. P. Kuipers, *Frontiers in Microbiology*, 2021, **12**.

145. J. Chu, B. Koirala, N. Forelli, X. Vila-Farres, M. A. Ternei, T. Ali, D. A. Colosimo and S. F. Brady, *J Am Chem Soc*, 2020, **142**, 14158-14168.
146. E. J. Culp, N. Waglechner, W. Wang, A. A. Fiebig-Comyn, Y. P. Hsu, K. Koteva, D. Sychantha, B. K. Coombes, M. S. Van Nieuwenhze, Y. V. Brun and G. D. Wright, *Nature*, 2020, **578**, 582-587.
147. H. He, R. T. Williamson, B. Shen, E. I. Graziani, H. Y. Yang, S. M. Sakya, P. J. Petersen and G. T. Carter, *J Am Chem Soc*, 2002, **124**, 9729-9736.
148. M. N. Thaker, W. Wang, P. Spanogiannopoulos, N. Waglechner, A. M. King, R. Medina and G. D. Wright, *Nat Biotechnol*, 2013, **31**, 922-927.
149. K. Shimanaka, N. Kinoshita, H. Iinuma, M. Hamada and T. Takeuchi, *J Antibiot (Tokyo)*, 1994, **47**, 668-674.
150. C. J. Schwalen, G. A. Hudson, B. Kille and D. A. Mitchell, *J Am Chem Soc*, 2018, **140**, 9494-9501.
151. S. Um, E. Seibel, F. Schalk, S. Balluff and C. Beemelmans, *J Nat Prod*, 2021, **84**, 1002-1011.
152. M. S. Donia, P. Cimermancic, C. J. Schulze, L. C. Wieland Brown, J. Martin, M. Mitreva, J. Clardy, R. G. Lington and M. A. Fischbach, *Cell*, 2014, **158**, 1402-1414.
153. X. Zhou, H. Huang, Y. Chen, J. Tan, Y. Song, J. Zou, X. Tian, Y. Hua and J. Ju, *J Nat Prod*, 2012, **75**, 2251-2255.
154. J. E. Leet, W. Li, H. A. Ax, J. A. Matson, S. Huang, R. Huang, J. L. Cantone, D. Drexler, R. A. Dalterio and K. S. Lam, *J Antibiot (Tokyo)*, 2003, **56**, 232-242.
155. H. Jayasuriya, K. Herath, J. G. Ondeyka, C. Zhang, D. L. Zink, M. Brower, F. P. Gailliot, J. Greene, G. Birdsall, J. Venugopal, M. Ushio, B. Burgess, G. Russotti, A. Walker, M. Hesse, A. Seeley, B. Junker, N. Connors, O. Salazar, O. Genilloud, K. Liu, P. Masurekar, J. F. Barrett and S. B. Singh, *J Antibiot (Tokyo)*, 2007, **60**, 554-564.
